# Supplementary material
Source: PubMed Central journal article supplement (PMC5664197)

## **SUPPLEMENTARY MATERIAL**

### **Design, Synthesis and Application of Polymer-Supported Silicon Transfer Agents for Cross-Coupling Reactions with Organolithium Reagents**

Minh H. Nguyen, Kevin T. O'Brien and Amos B. Smith, III\*

Department of Chemistry, Laboratory for Research on the Structure of Matter and

Monell Chemical Senses Center, University of Pennsylvania, Philadelphia,

Pennsylvania 19104, United States

smithab@sas.upenn.edu

**$^1\text{H}$  NMR and  $^{13}\text{C}$  NMR spectra of new compounds and cross-coupling products**

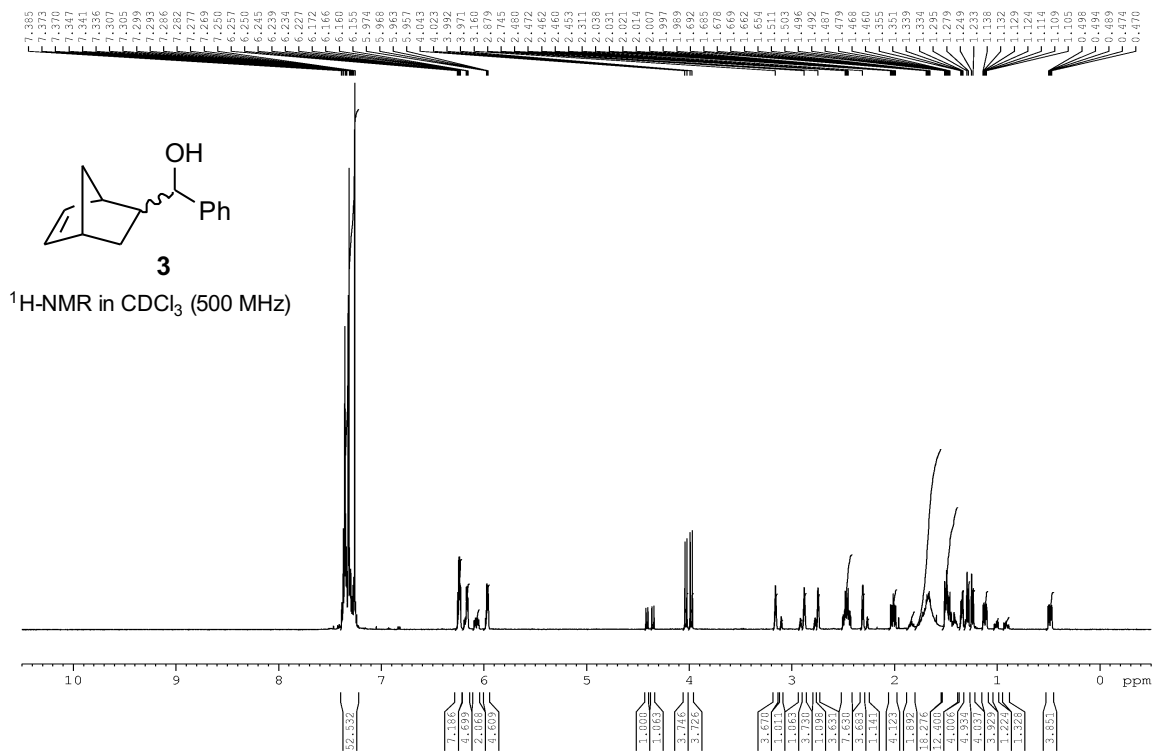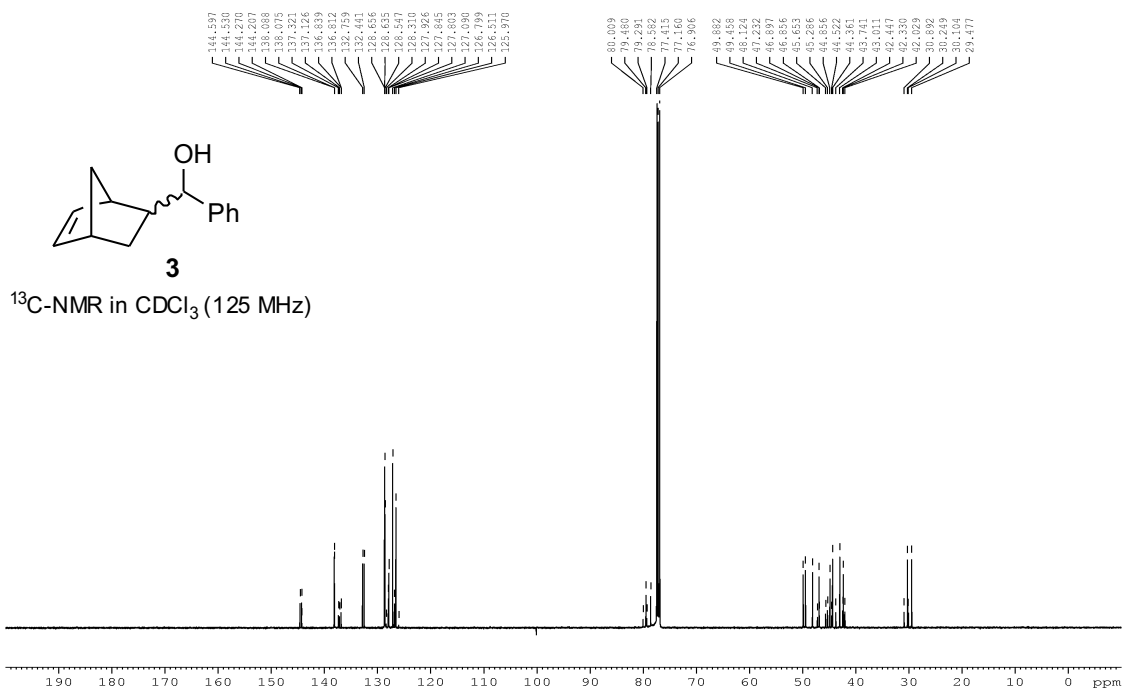



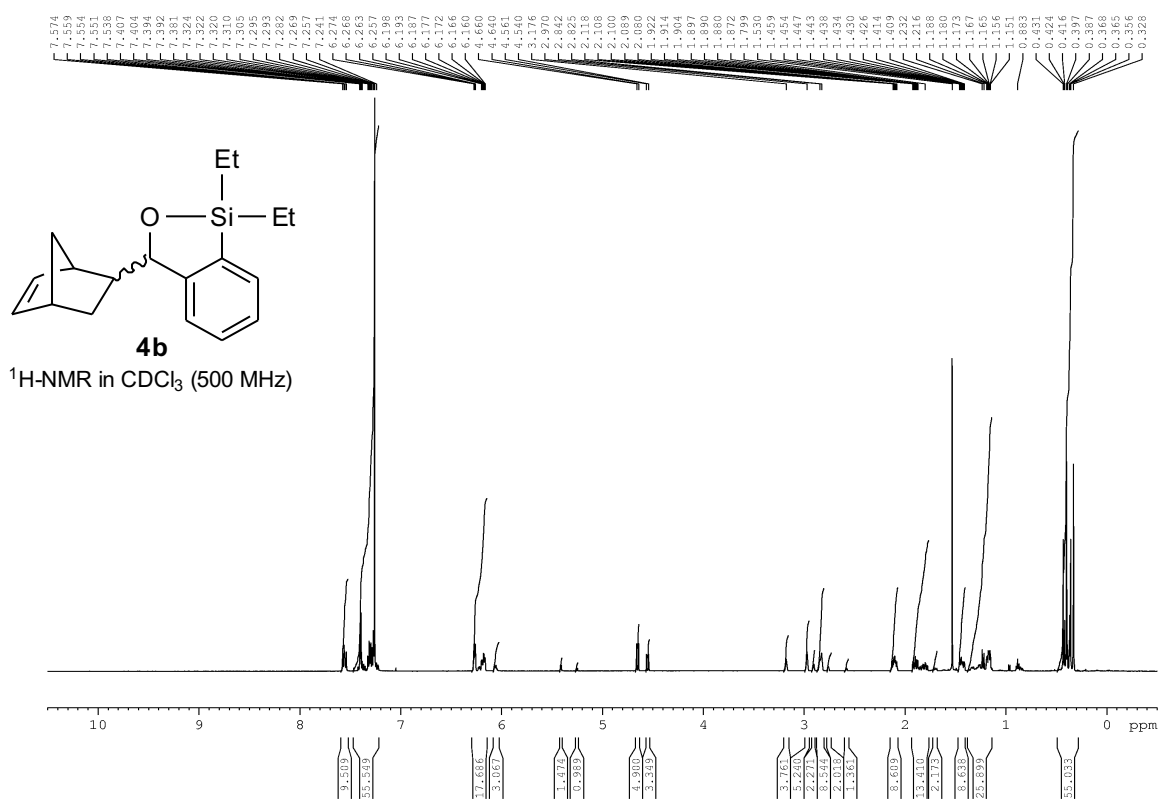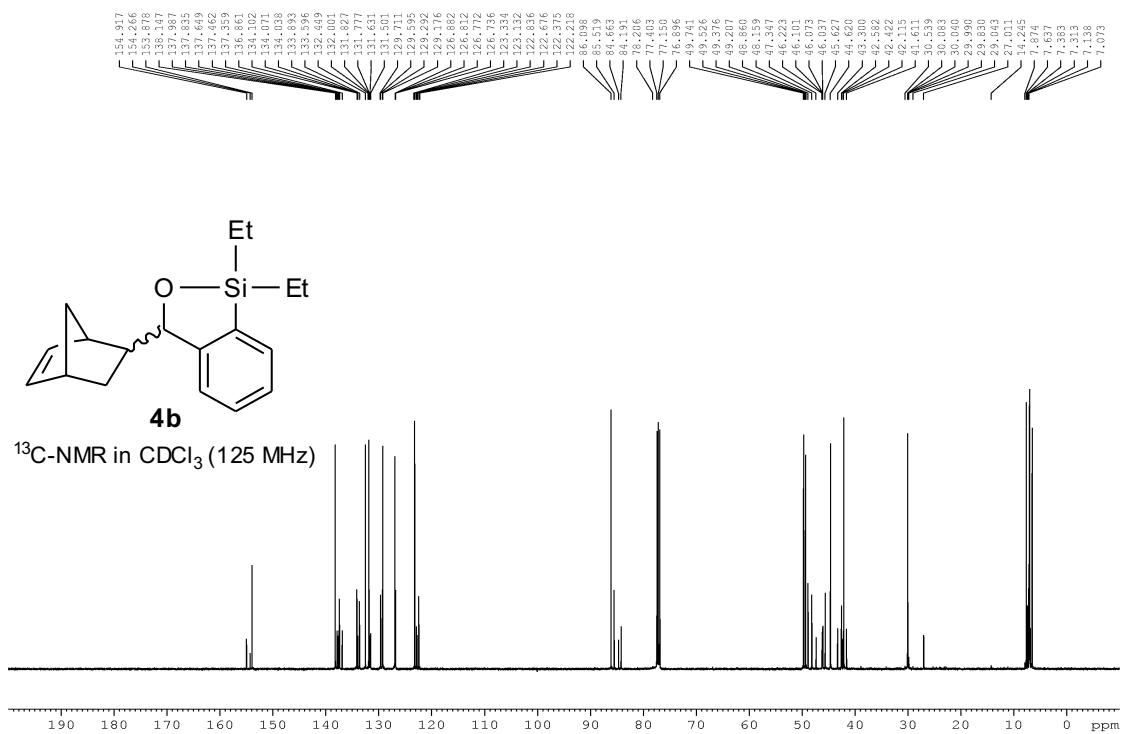

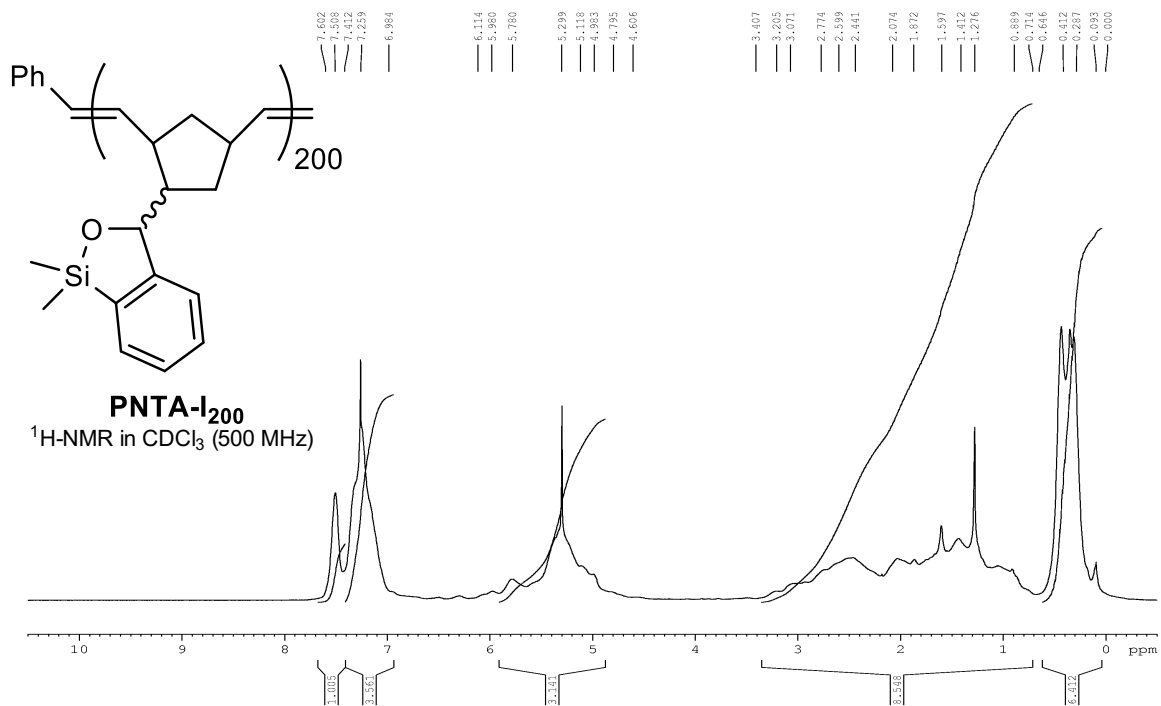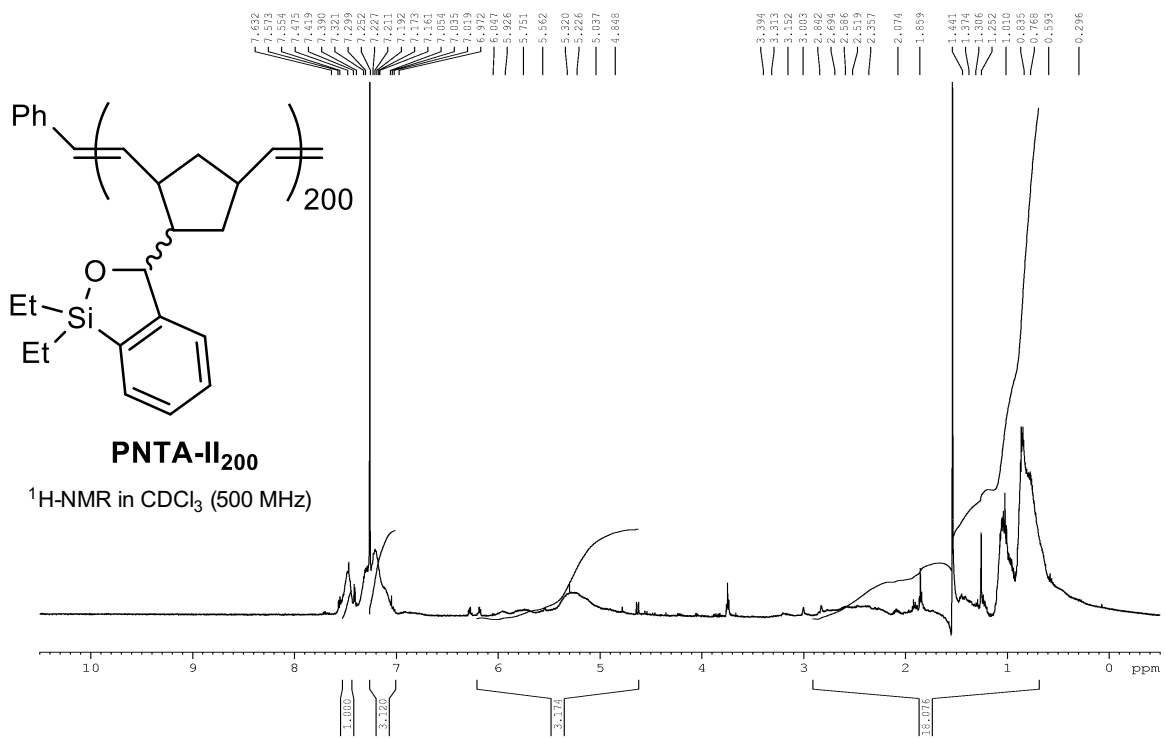



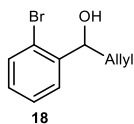

<sup>1</sup>H-NMR in CDCl<sub>3</sub> (500 MHz)

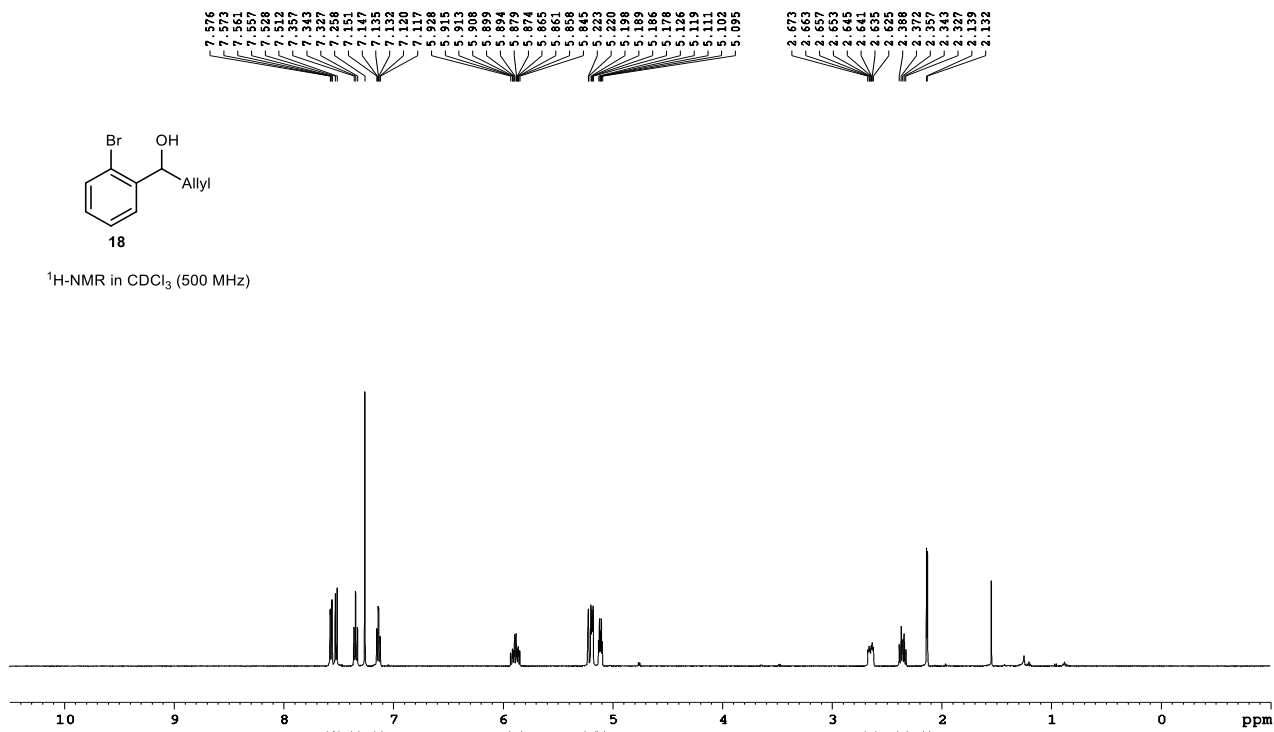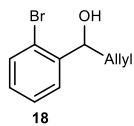

<sup>13</sup>C-NMR in CDCl<sub>3</sub> (125 MHz)

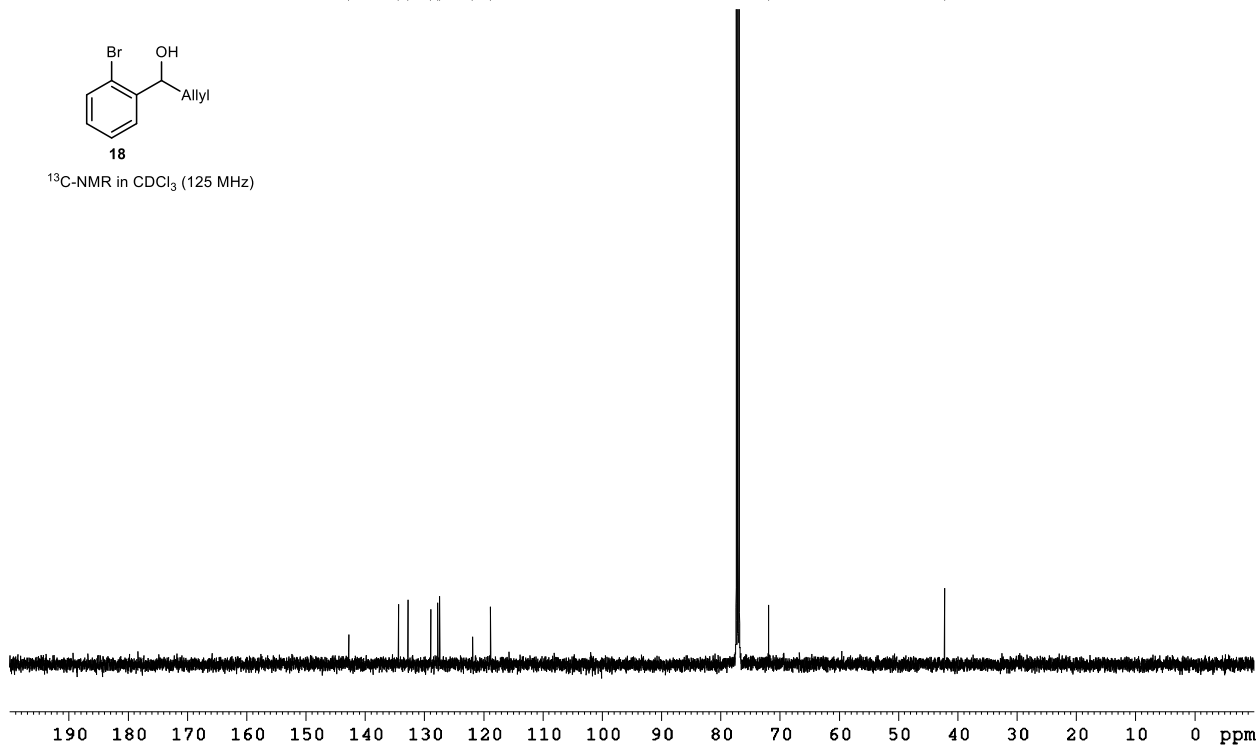

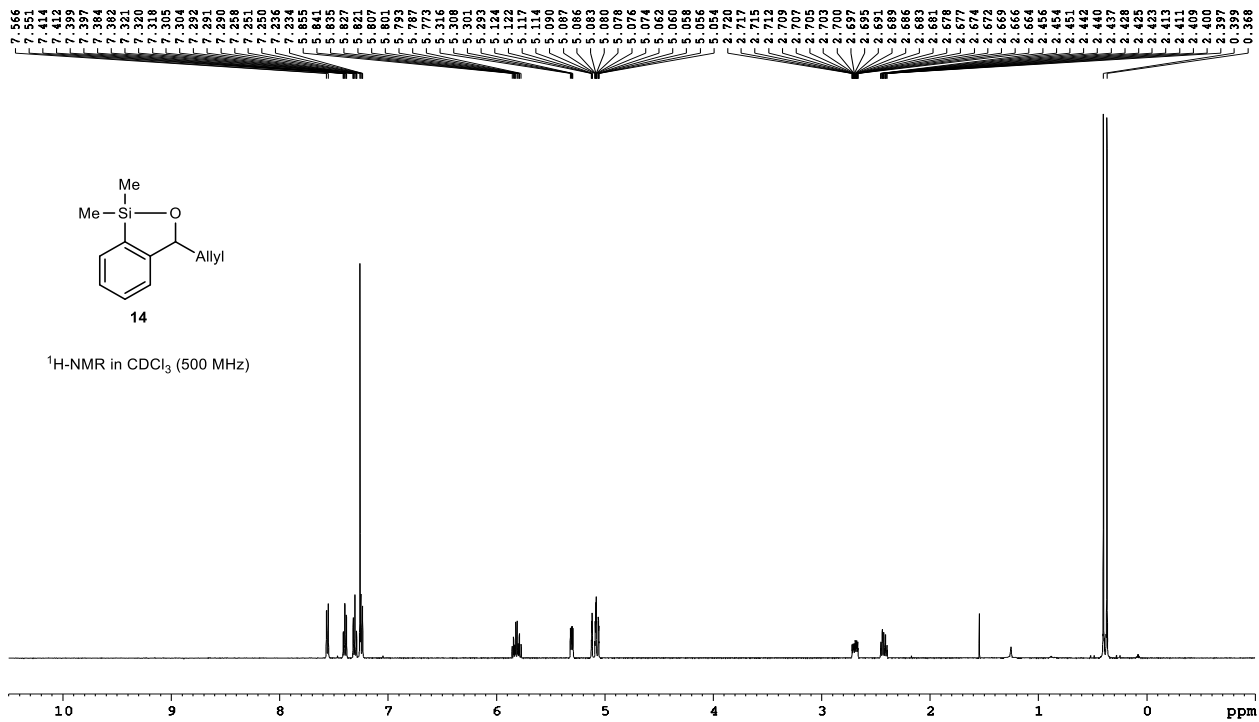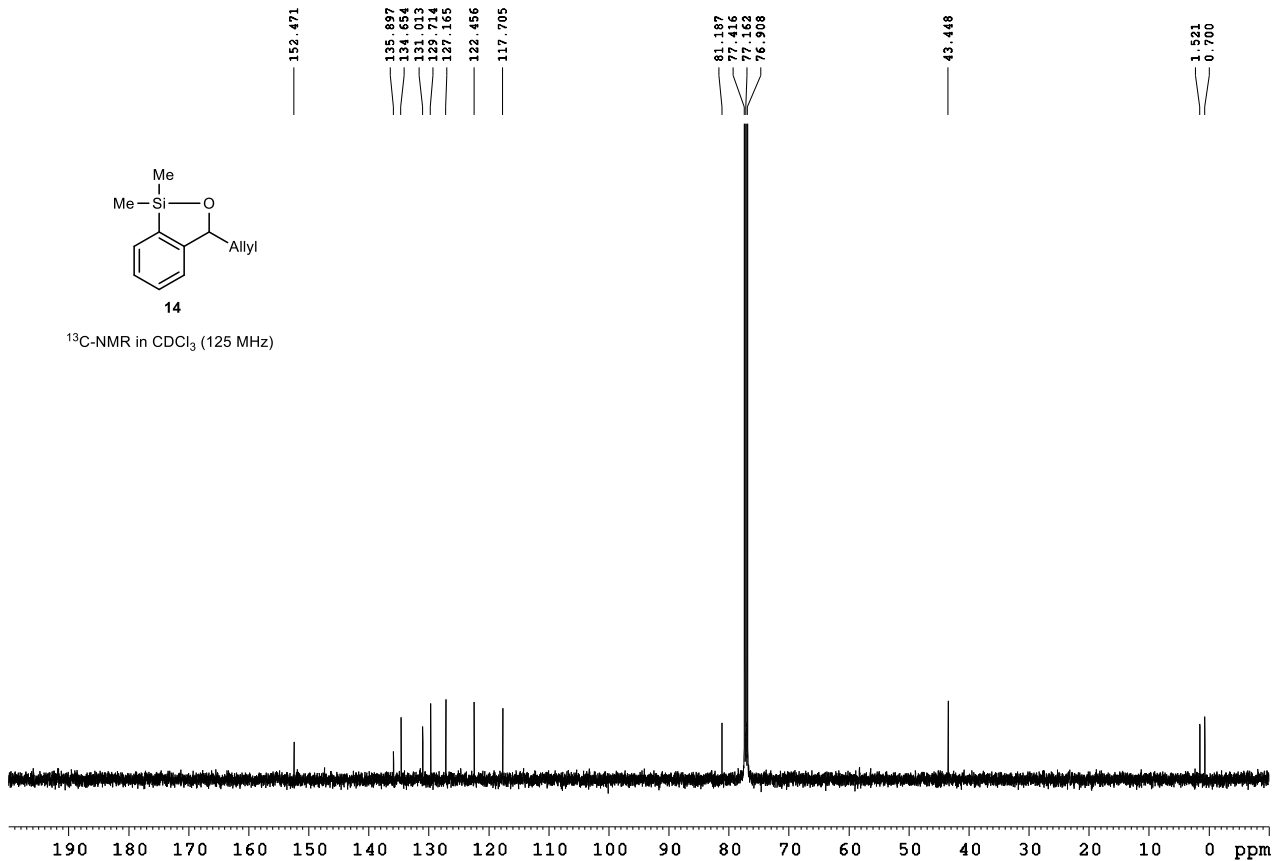





7.550  
7.535  
7.389  
7.387  
7.372  
7.359  
7.357  
7.319  
7.303  
7.287  
7.268  
7.264  
7.185  
7.150  
7.131  
7.115  
6.716  
6.684  
6.684  
6.659  
5.715  
5.714  
5.680  
5.679  
5.274  
5.274  
5.259  
5.252  
5.195  
5.194  
5.173  
5.172  
5.172  
2.686  
2.677  
2.664  
2.660  
2.646  
2.638  
2.604  
1.982  
1.978  
1.971  
1.968  
1.961  
1.956  
1.944  
1.941  
1.934  
1.930  
1.923  
1.807  
1.790  
1.785  
1.785  
1.773  
1.769  
1.762  
1.758  
1.748  
1.744  
1.741  
1.736  
1.732  
1.728  
1.723  
1.718  
1.711  
1.706  
1.701  
1.697  
1.676  
1.667  
1.655  
1.654  
1.652  
1.650  
1.646  
1.640  
1.634  
1.628  
1.628  
1.625  
1.619  
1.613  
0.383  
0.369

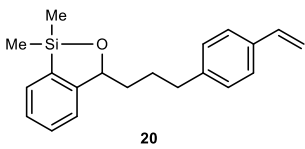

<sup>1</sup>H-NMR in CDCl<sub>3</sub> (500 MHz)

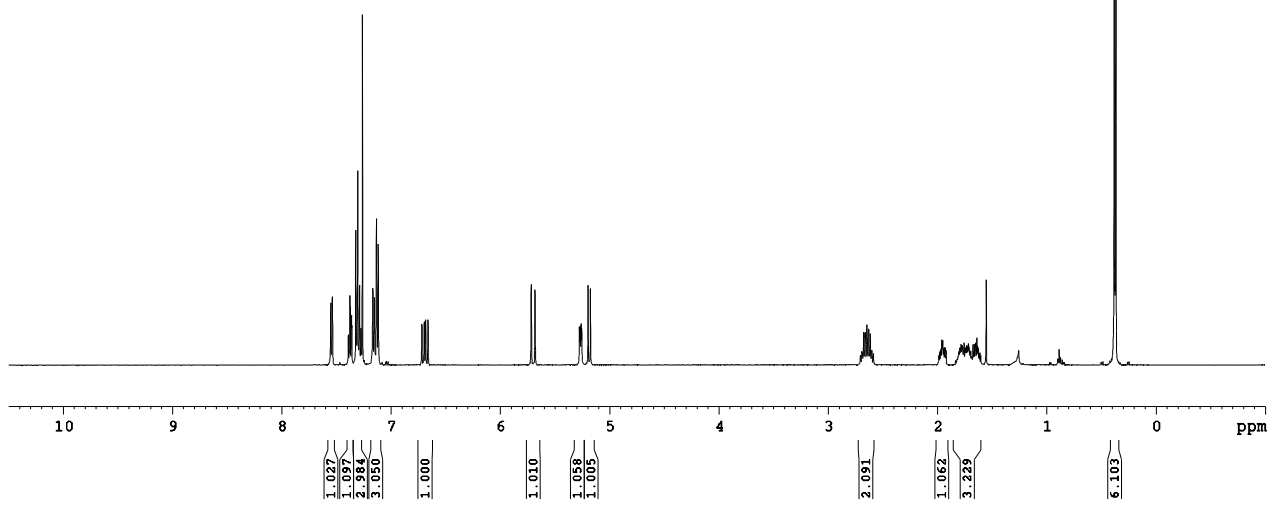

153.062  
142.277  
136.838  
135.876  
135.206  
130.953  
129.695  
128.694  
127.005  
126.265  
122.262  
112.927  
81.540  
77.385  
77.131  
76.877  
38.381  
35.589  
26.516  
1.445  
0.677

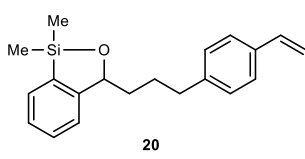

<sup>13</sup>C-NMR in CDCl<sub>3</sub> (125 MHz)

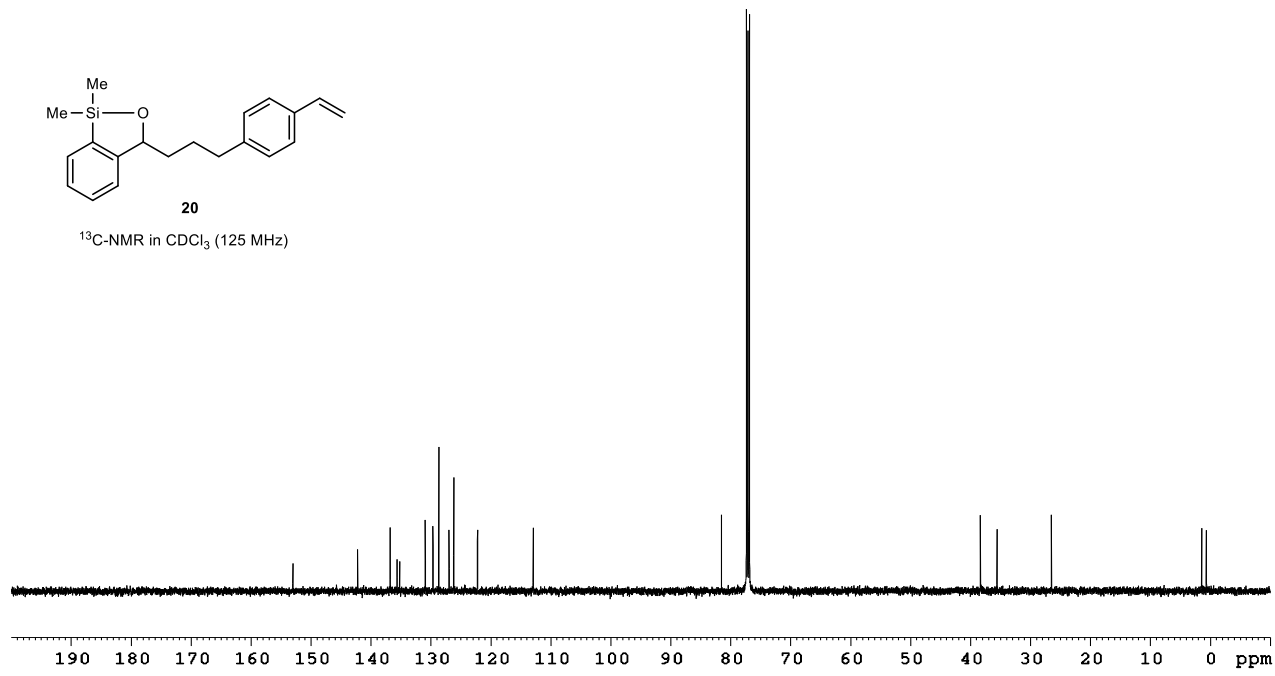

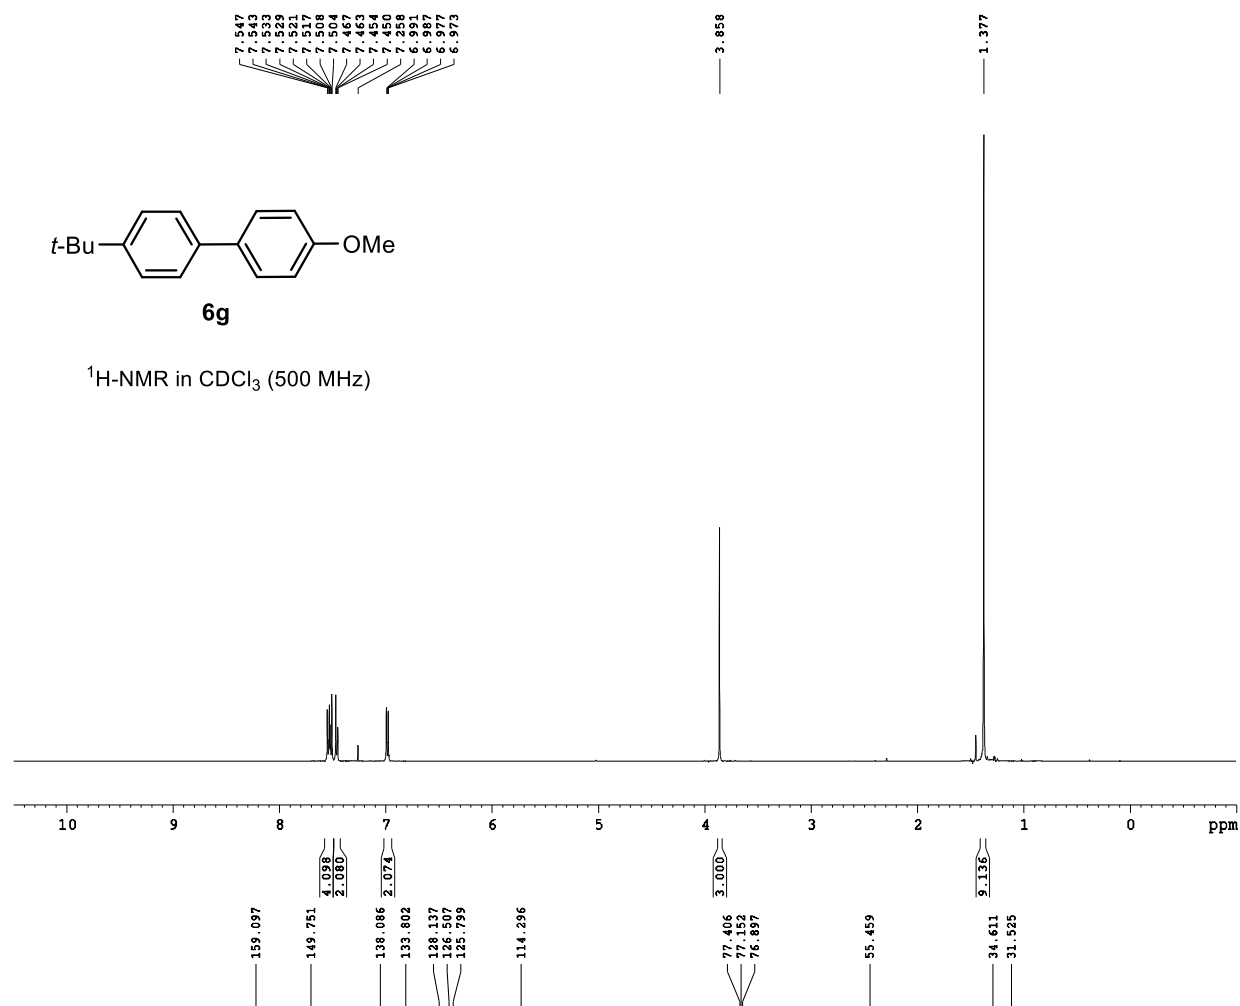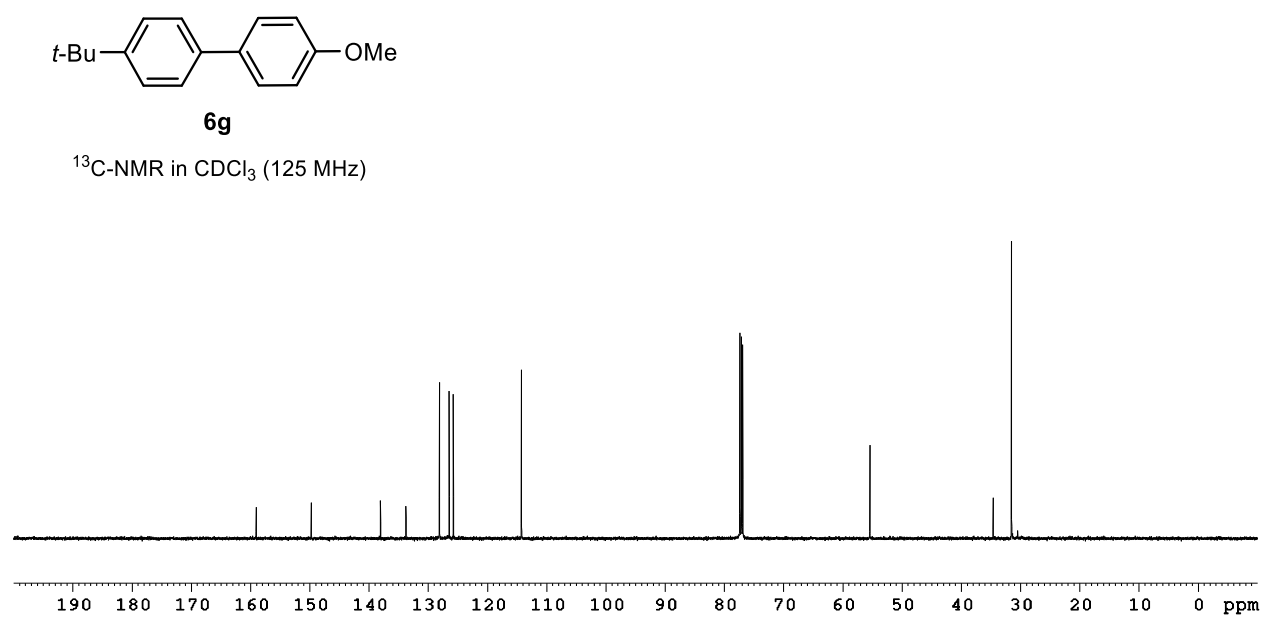

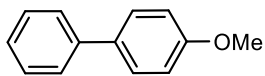

6

<sup>1</sup>H-NMR in CDCl<sub>3</sub> (500 MHz)

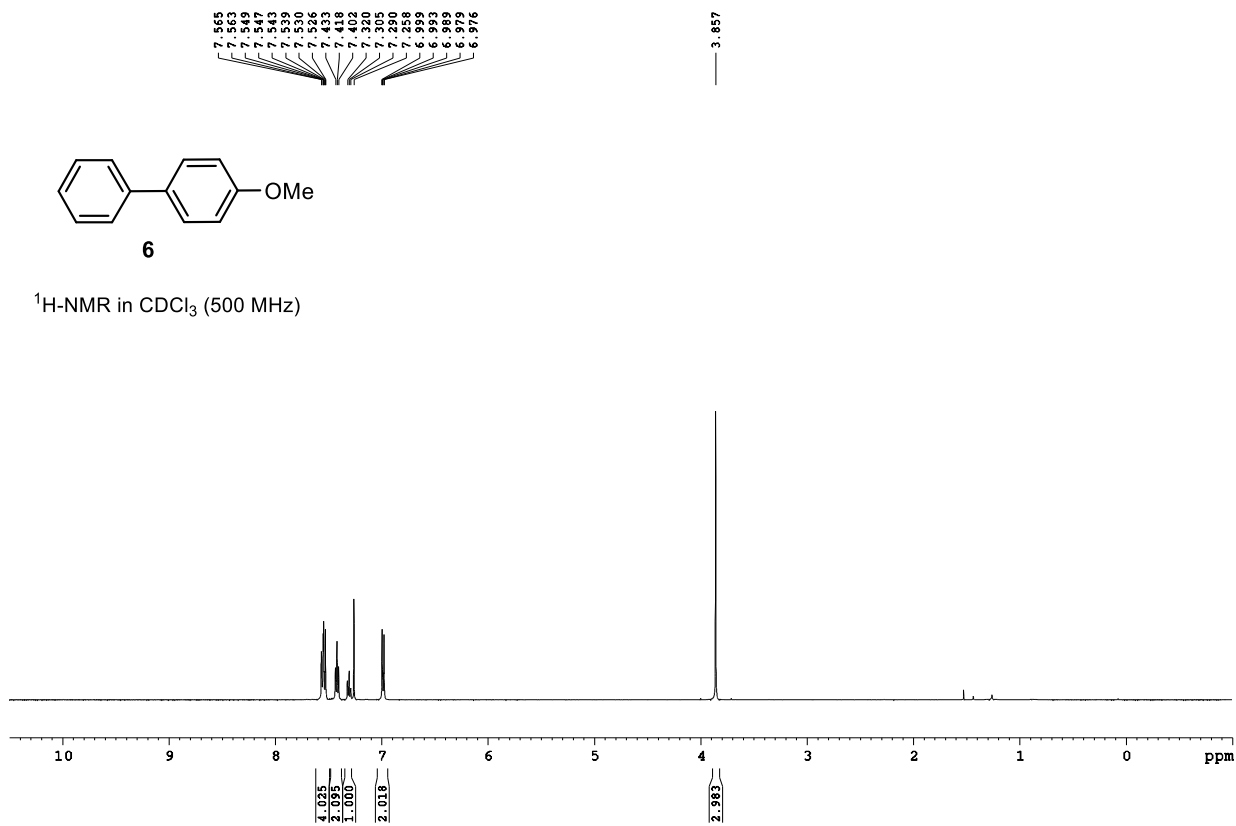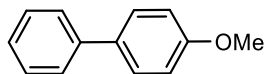

6

<sup>13</sup>C-NMR in CDCl<sub>3</sub> (125 MHz)

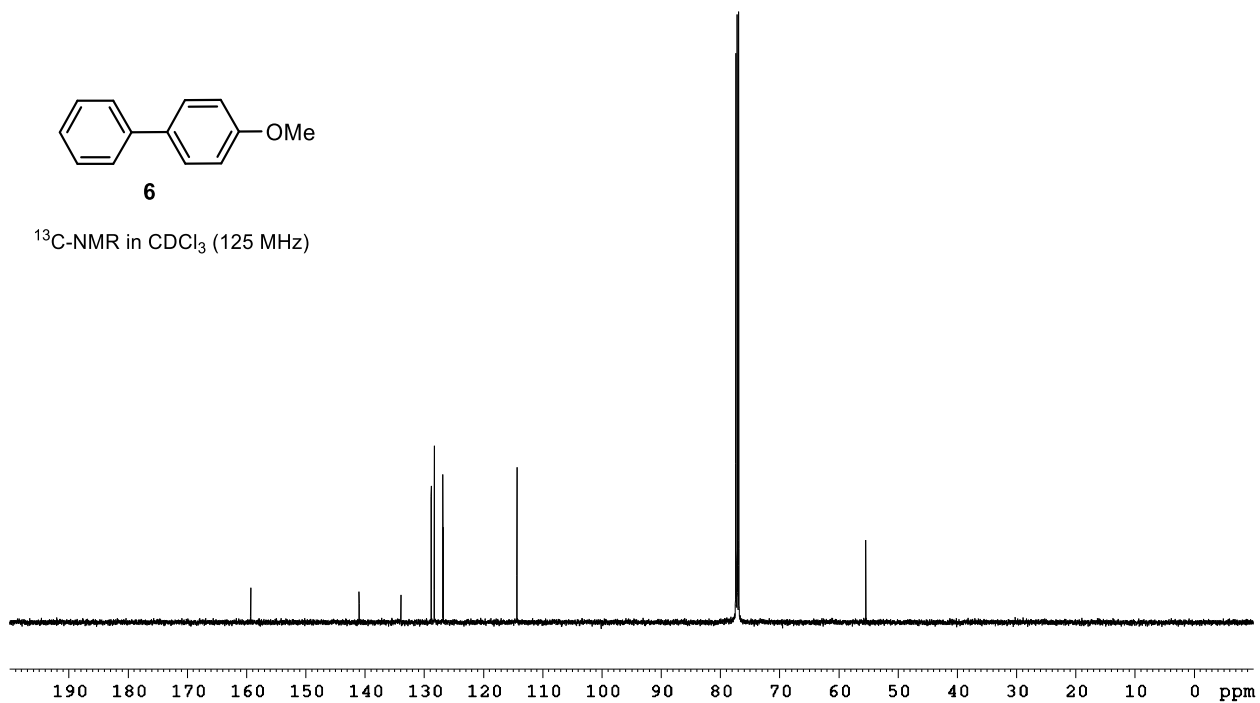

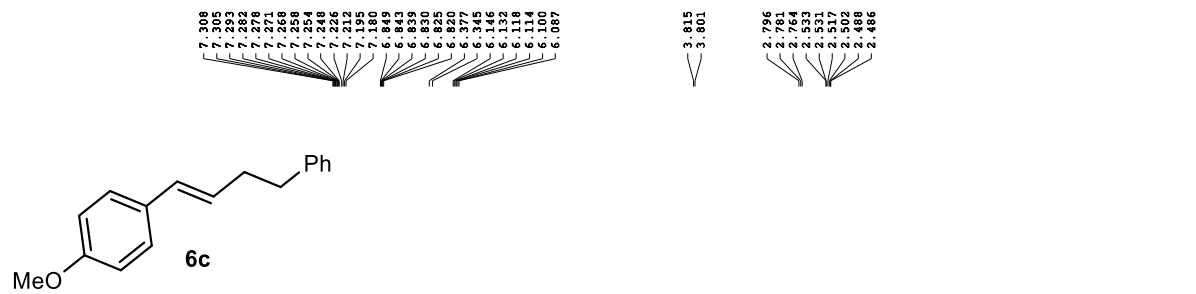

$^1\text{H-NMR}$  in  $\text{CDCl}_3$  (500 MHz)

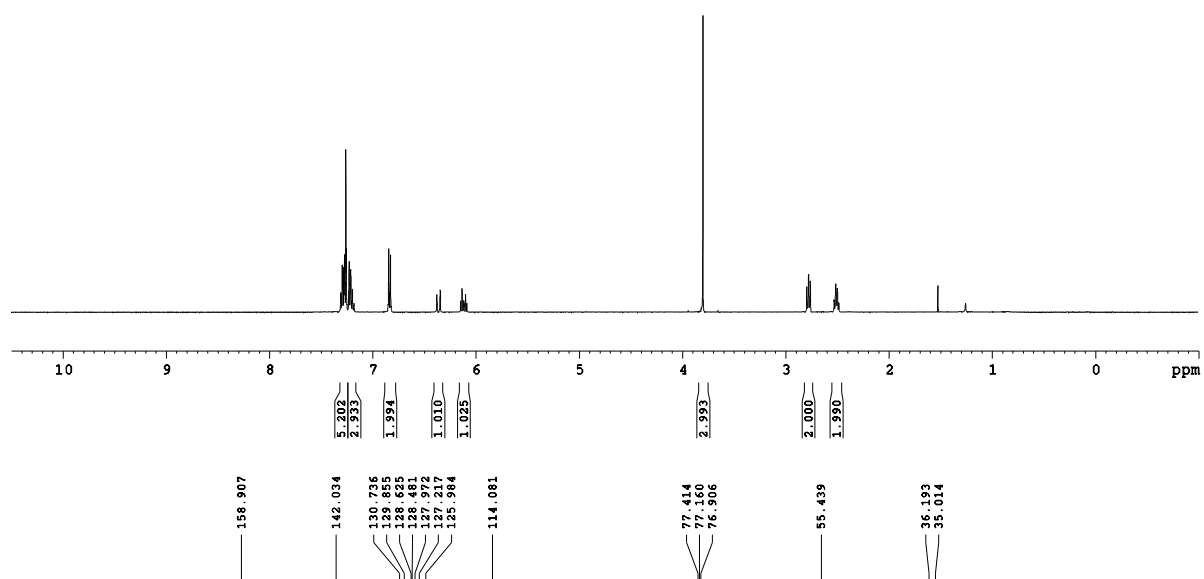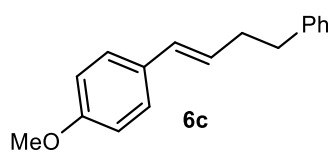

$^{13}\text{C-NMR}$  in  $\text{CDCl}_3$  (125 MHz)

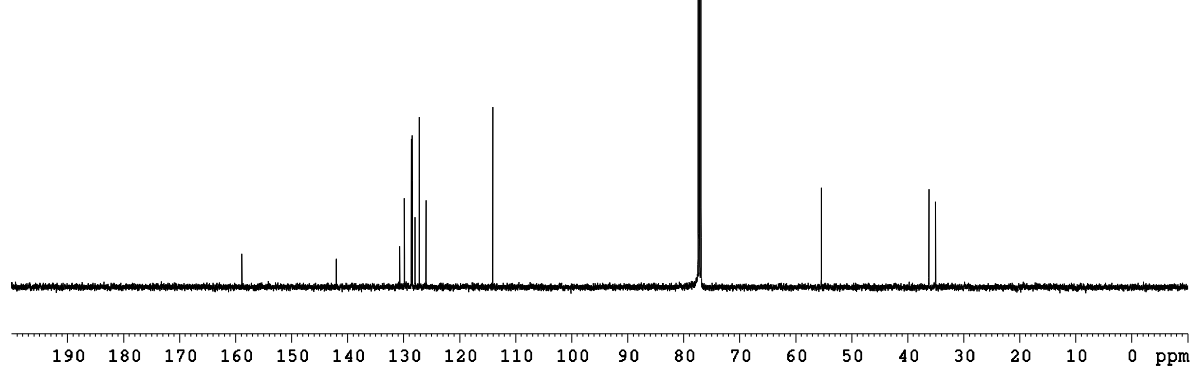

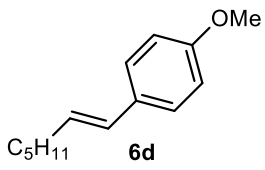

<sup>1</sup>H-NMR in CDCl<sub>3</sub> (500 MHz)

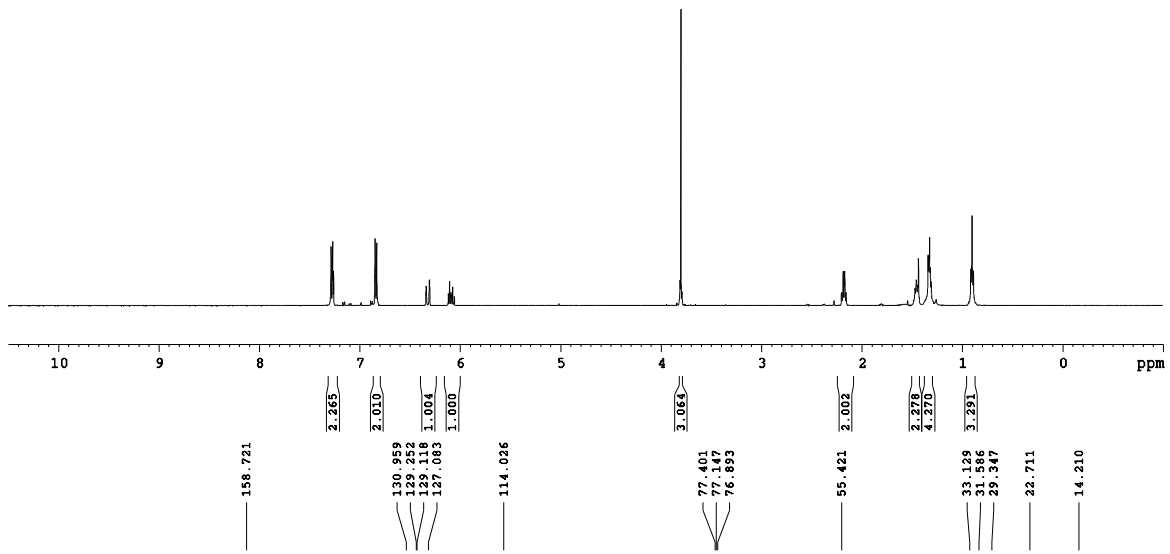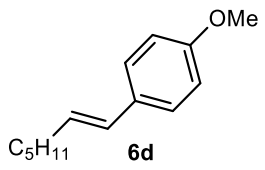

<sup>13</sup>C-NMR in CDCl<sub>3</sub> (125 MHz)

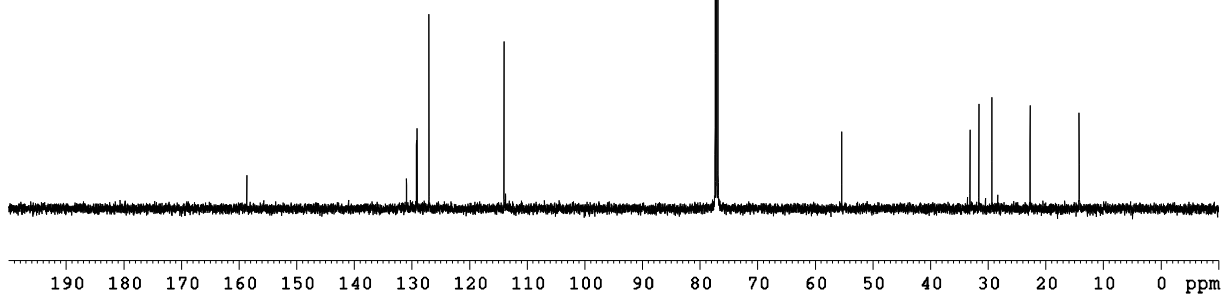

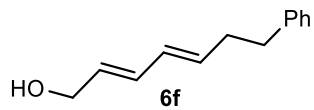

<sup>1</sup>H-NMR in CDCl<sub>3</sub> (500 MHz)

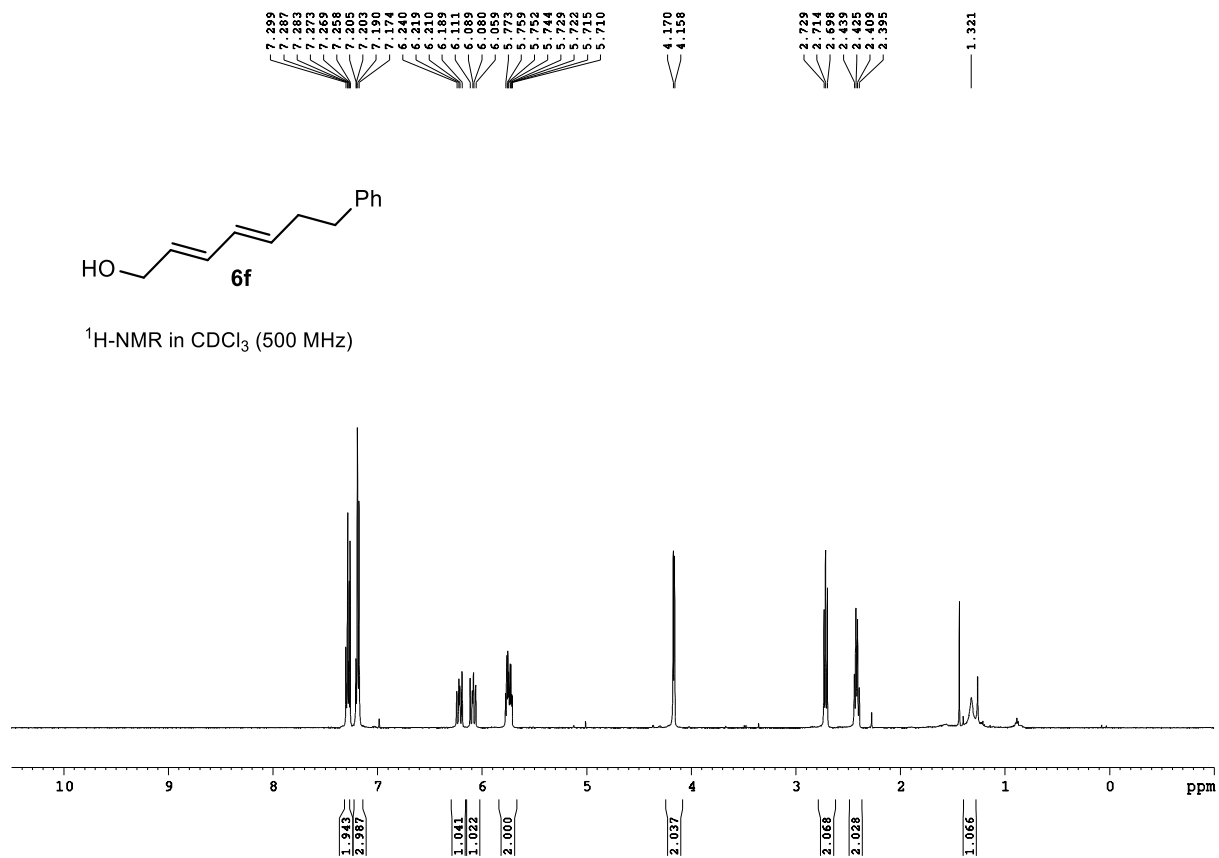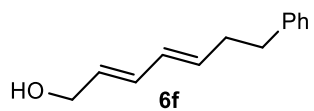

<sup>13</sup>C-NMR in CDCl<sub>3</sub> (125 MHz)

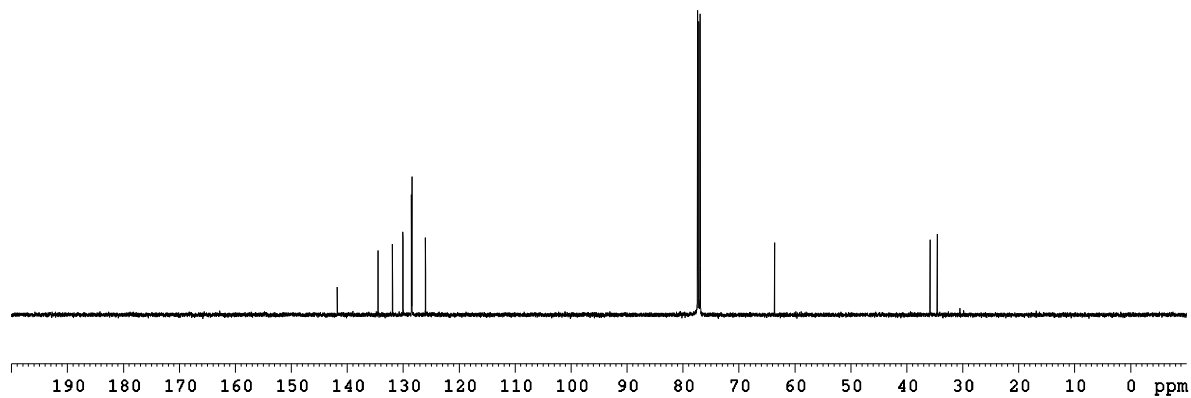

7.737  
7.684  
7.677  
7.599  
7.584  
7.582  
7.497  
7.471  
7.442  
7.427  
7.258

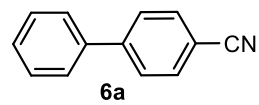

<sup>1</sup>H-NMR in CDCl<sub>3</sub> (500 MHz)

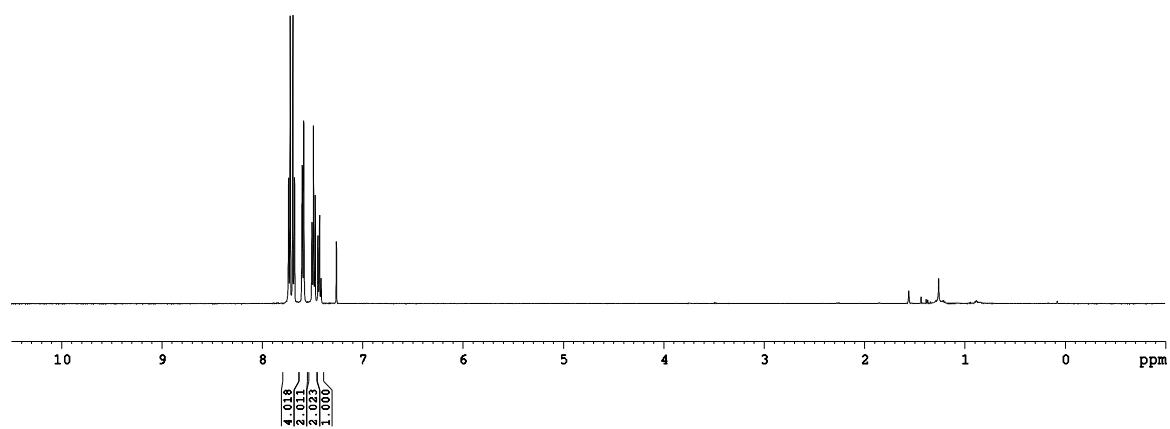

145.812  
139.316  
132.717  
129.238  
128.784  
127.860  
127.354  
119.048  
111.075  
77.403  
77.149  
76.895

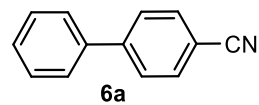

<sup>13</sup>C-NMR in CDCl<sub>3</sub> (125 MHz)

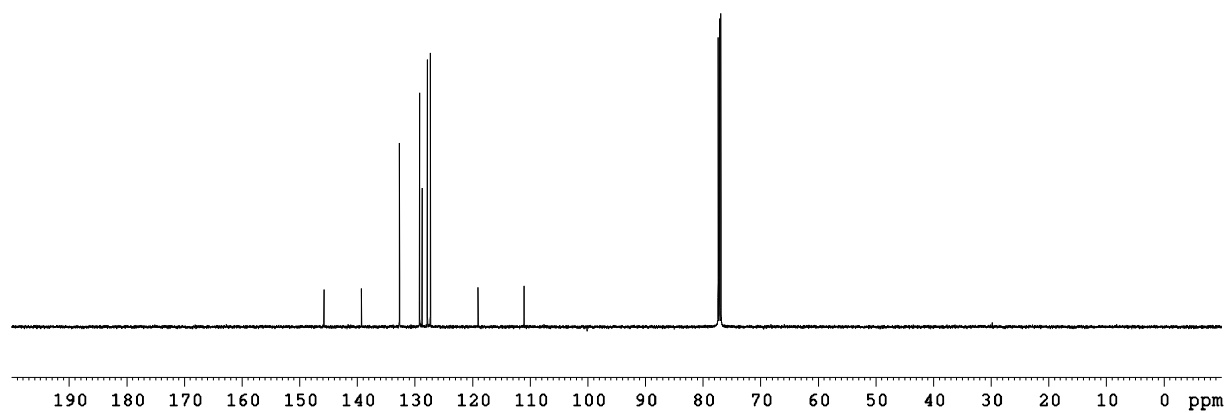





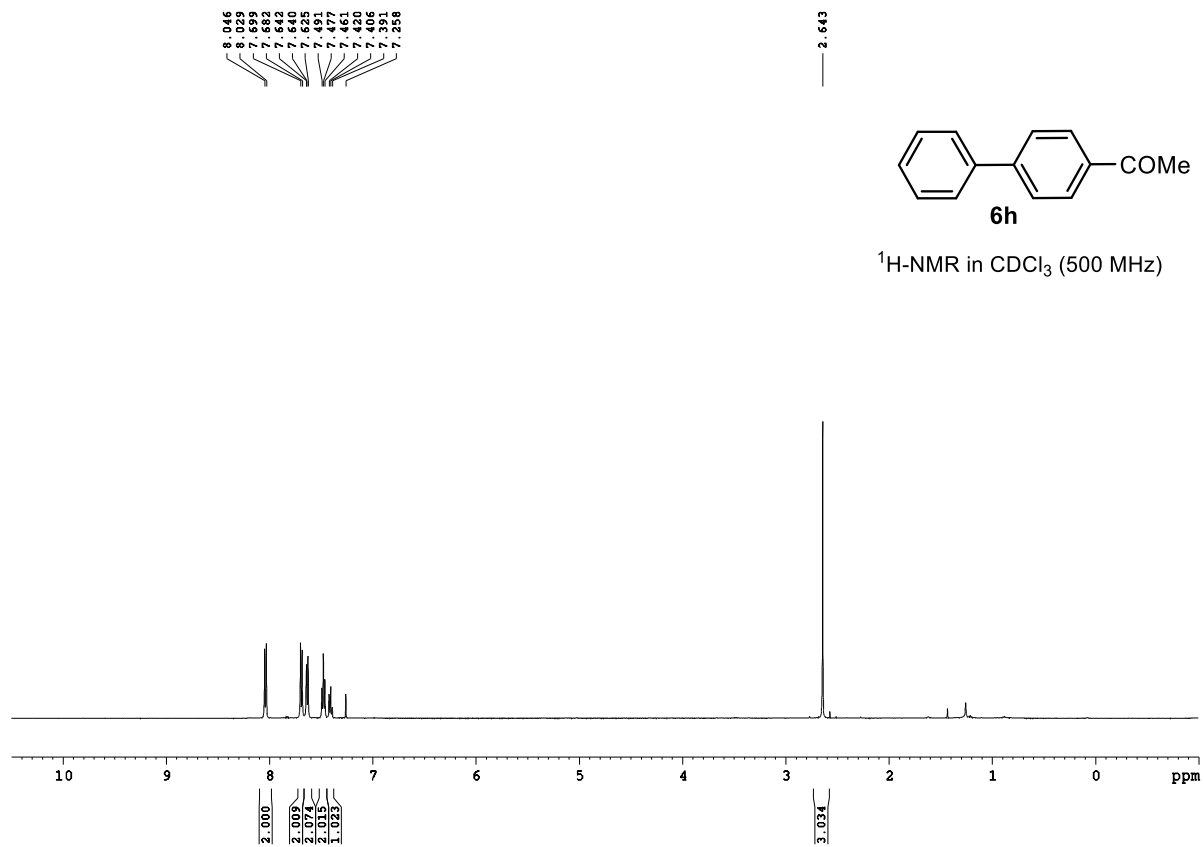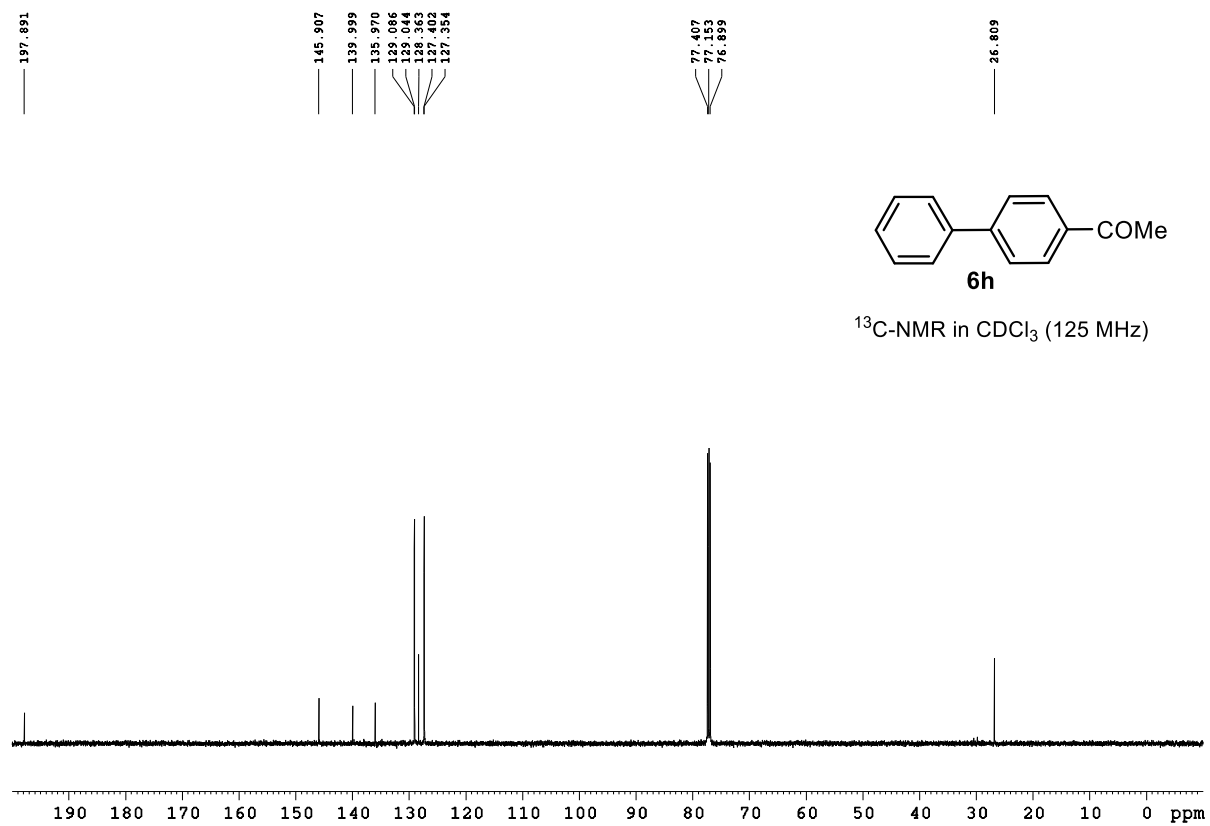

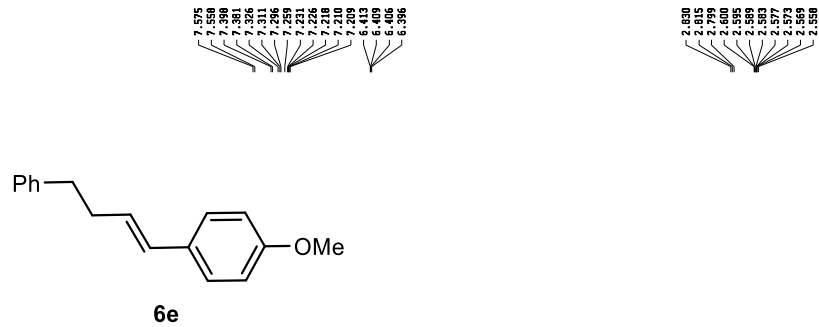

$^1\text{H-NMR}$  in  $\text{CDCl}_3$  (500 MHz)

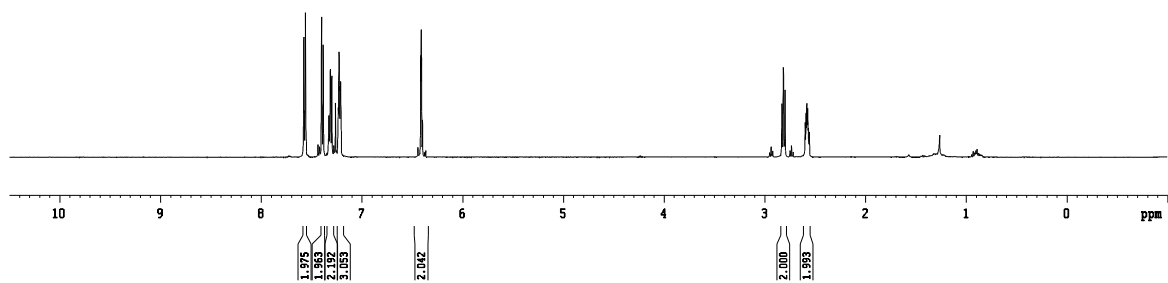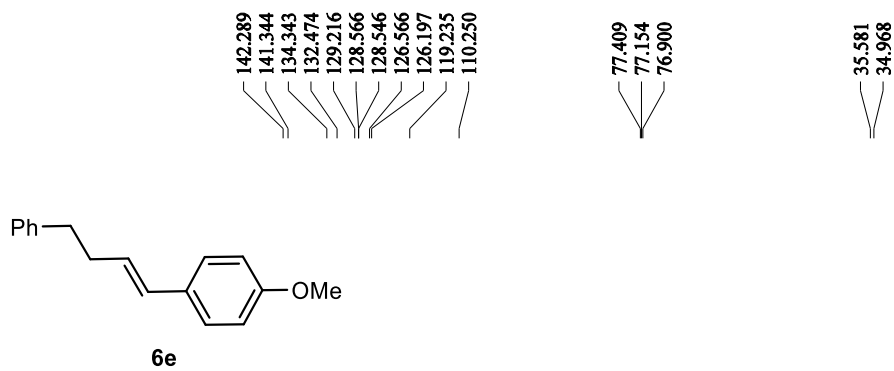

$^{13}\text{C-NMR}$  in  $\text{CDCl}_3$  (125 MHz)

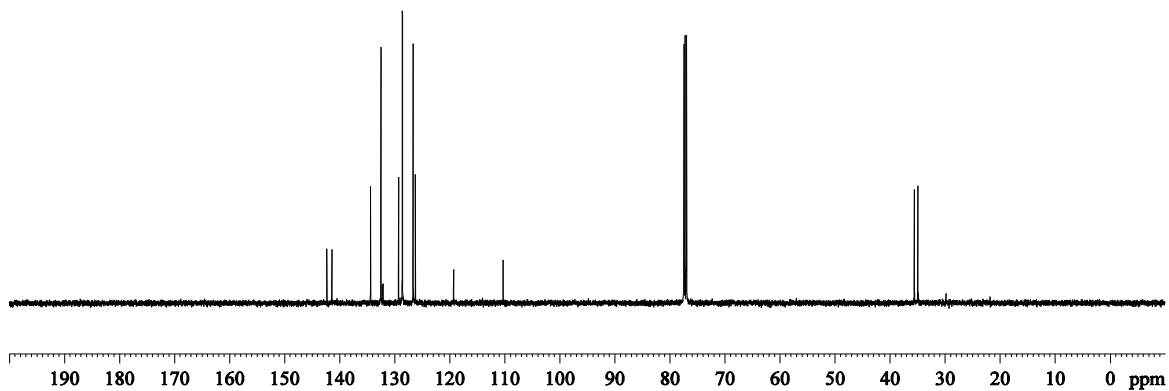

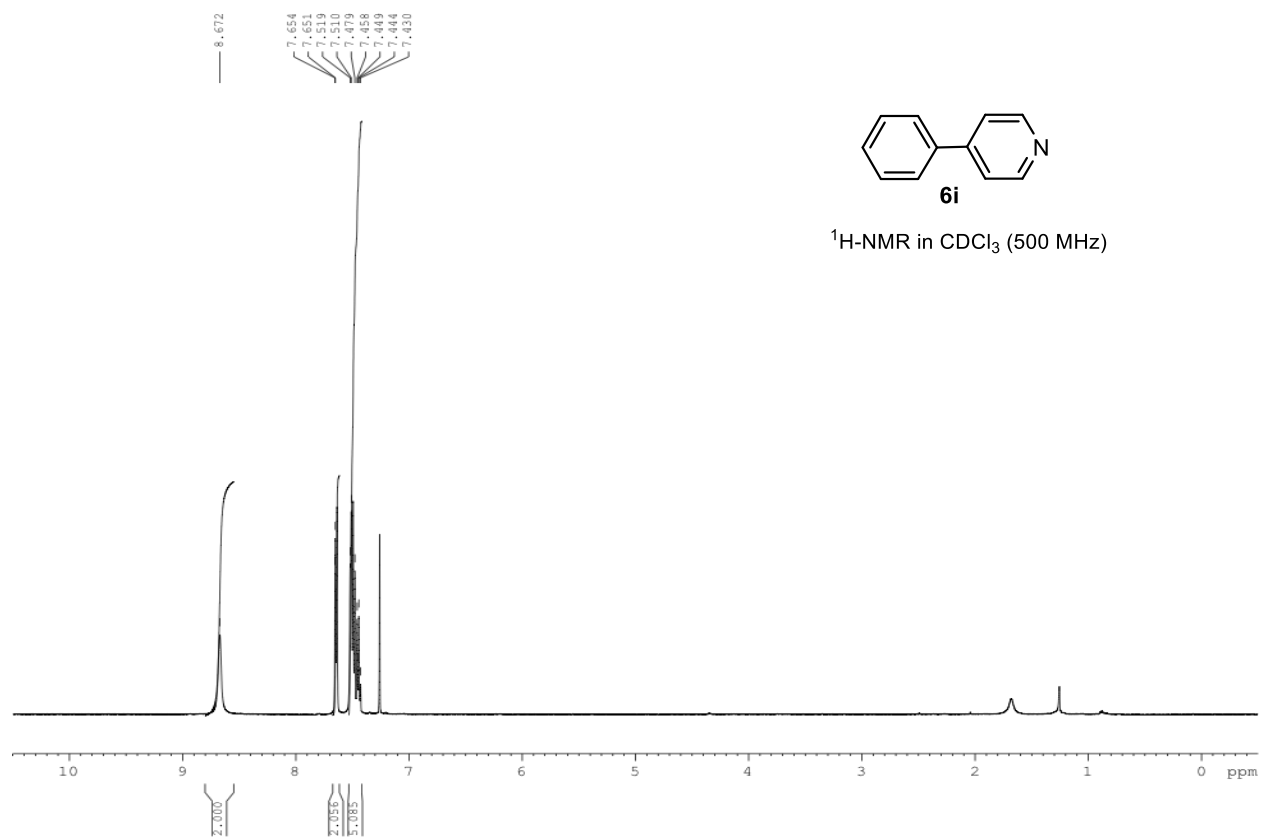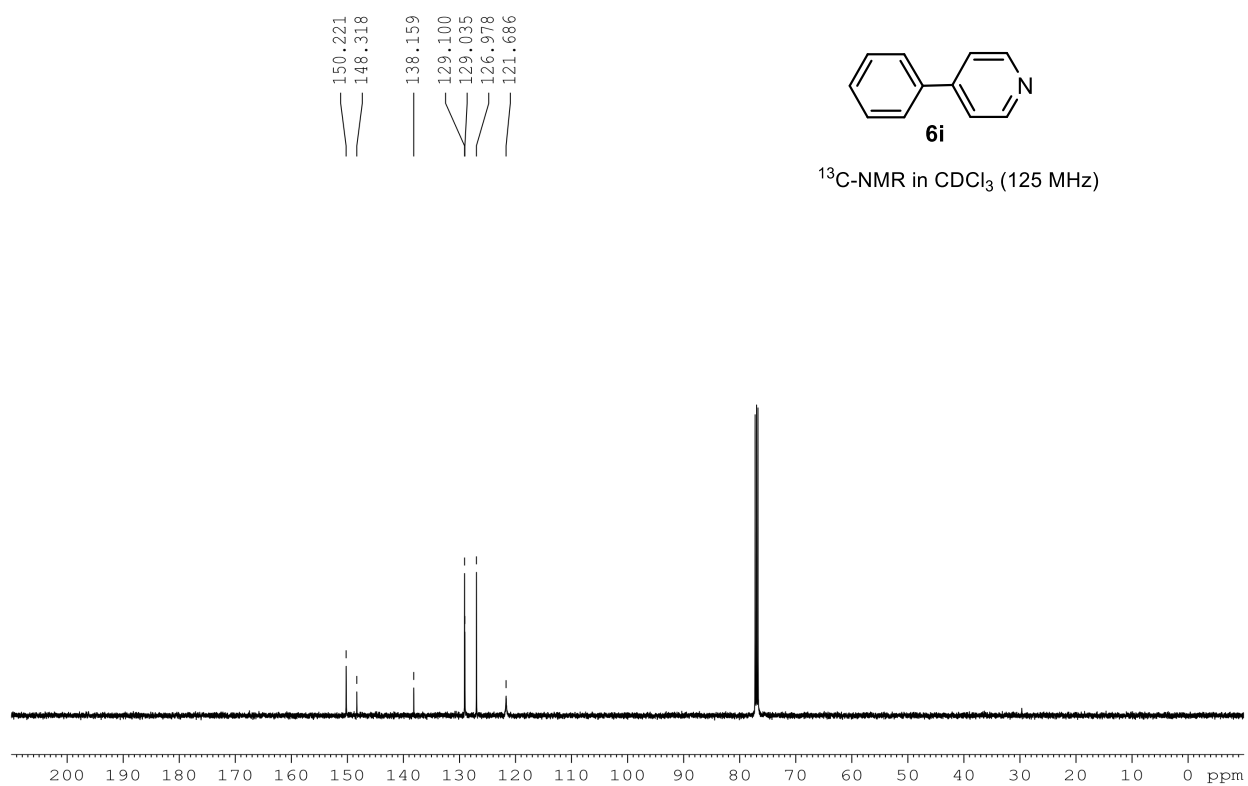

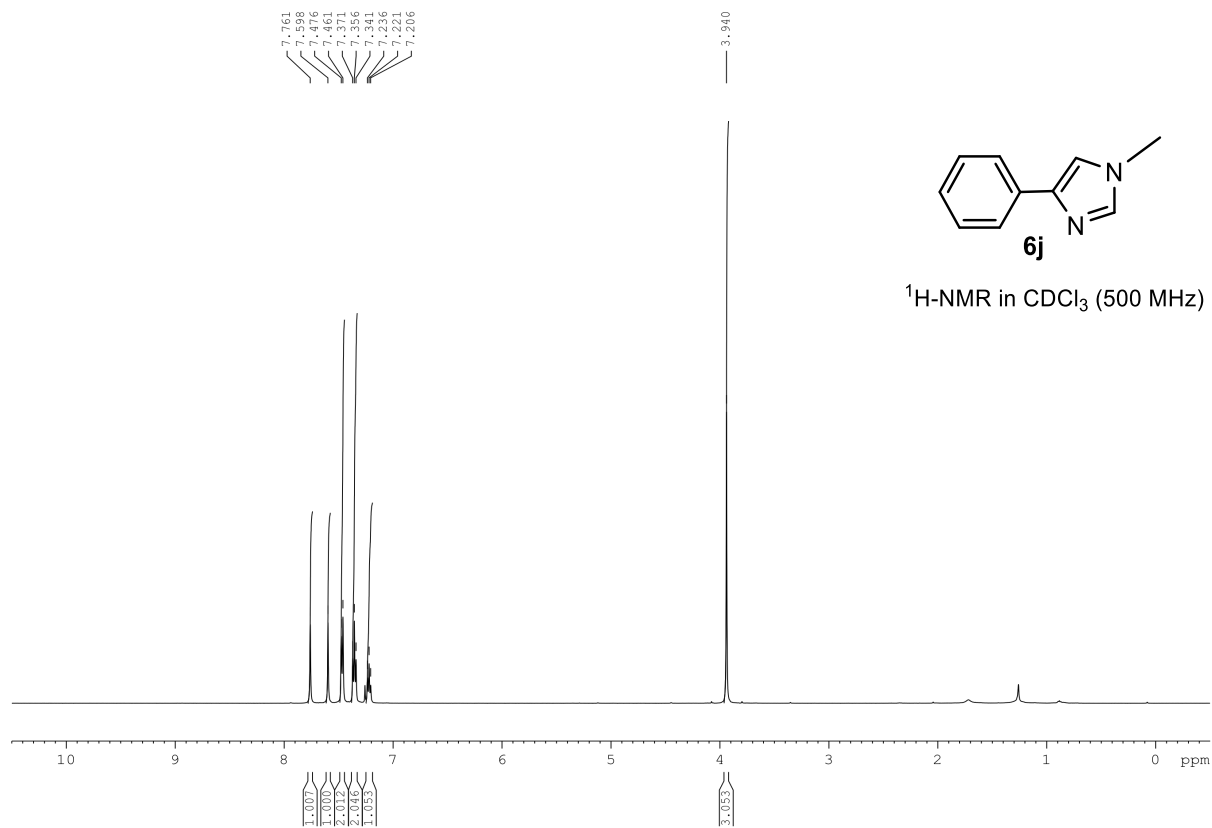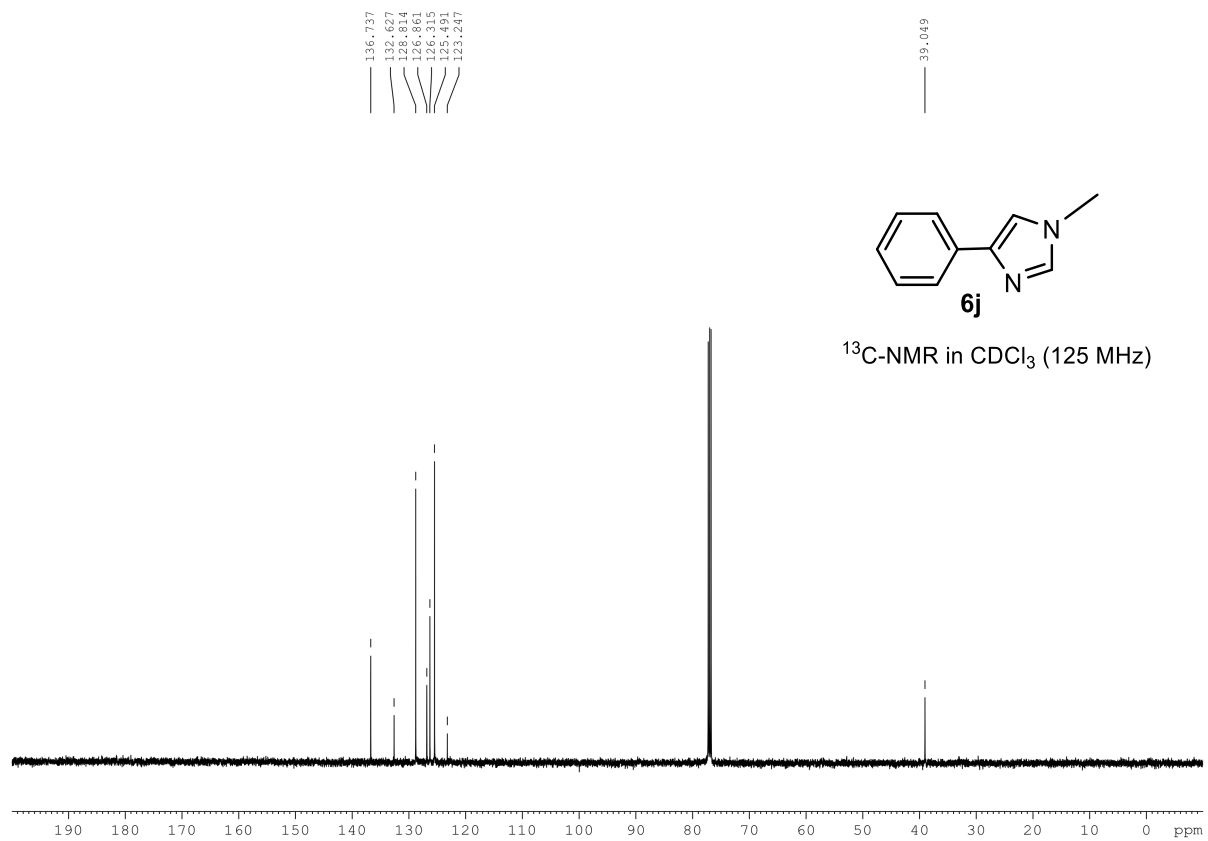

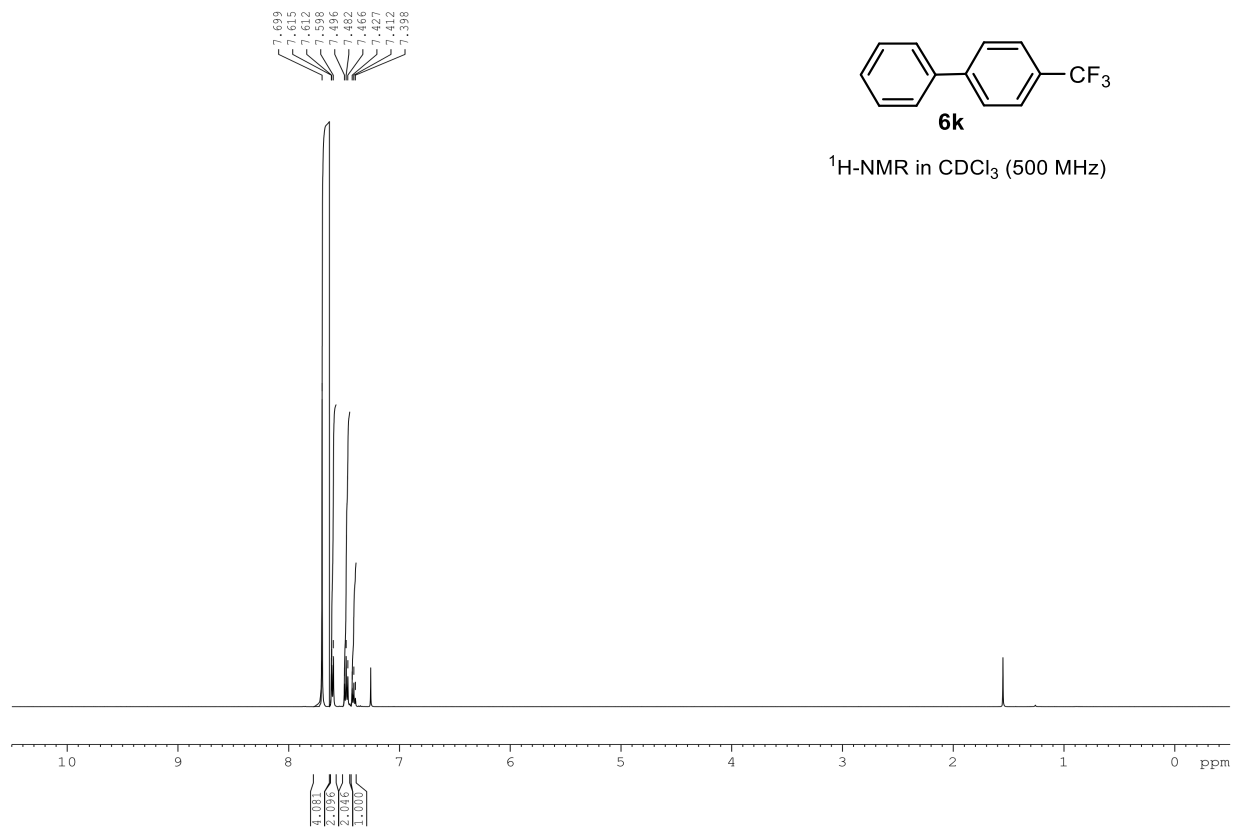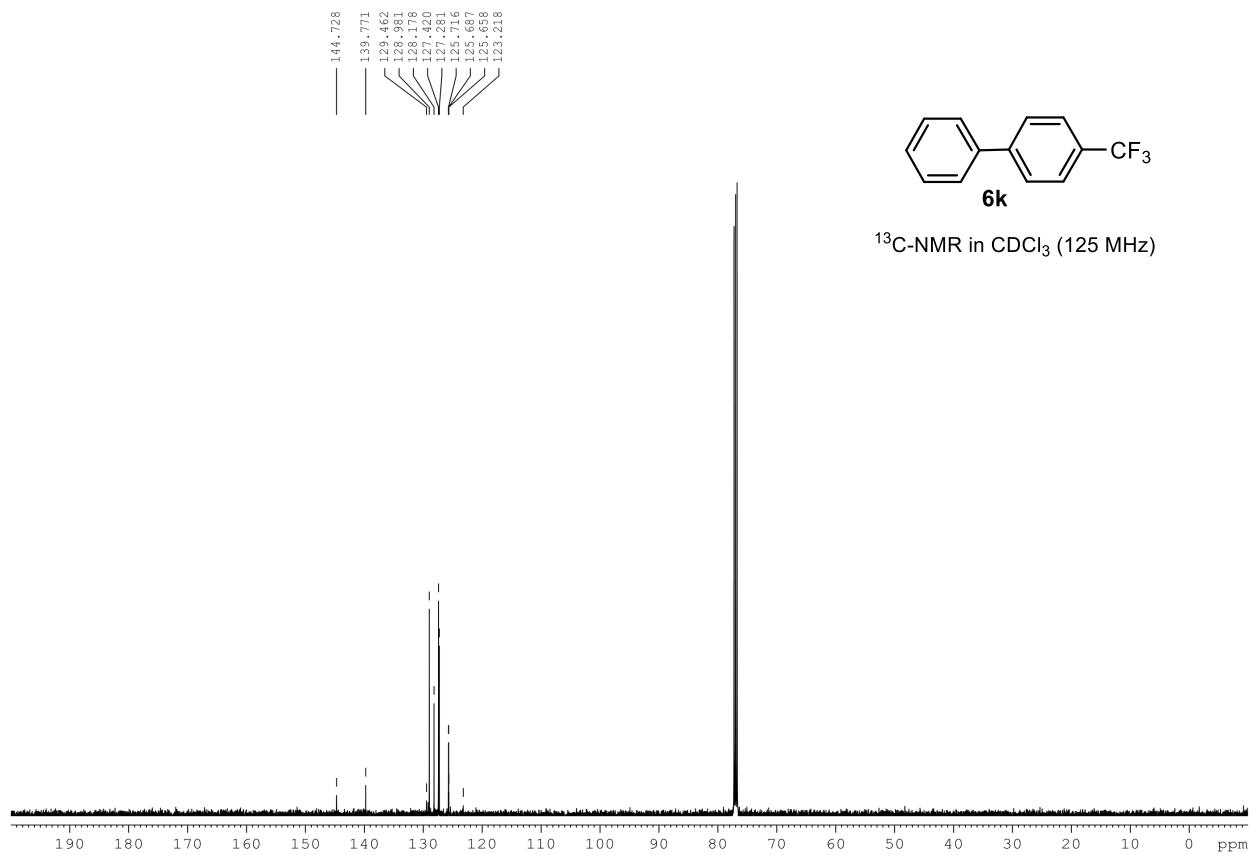

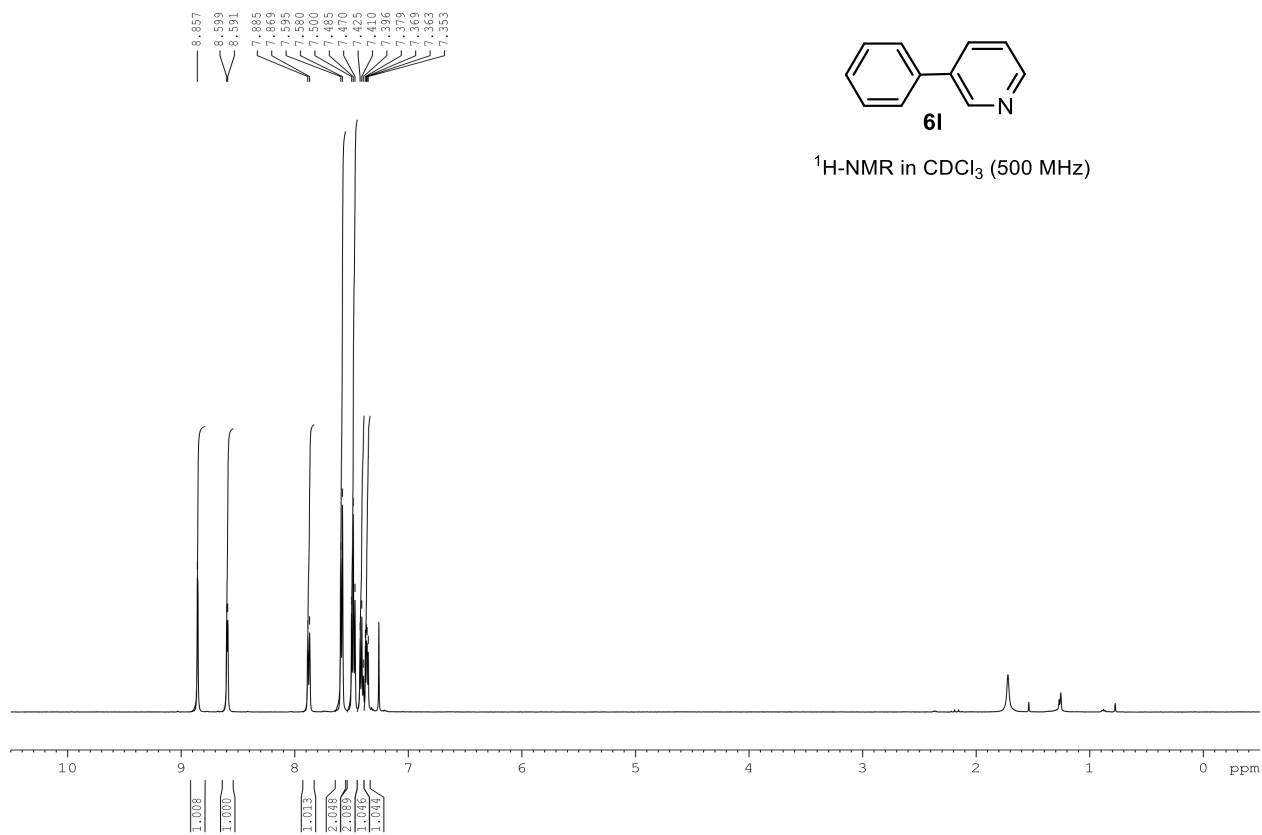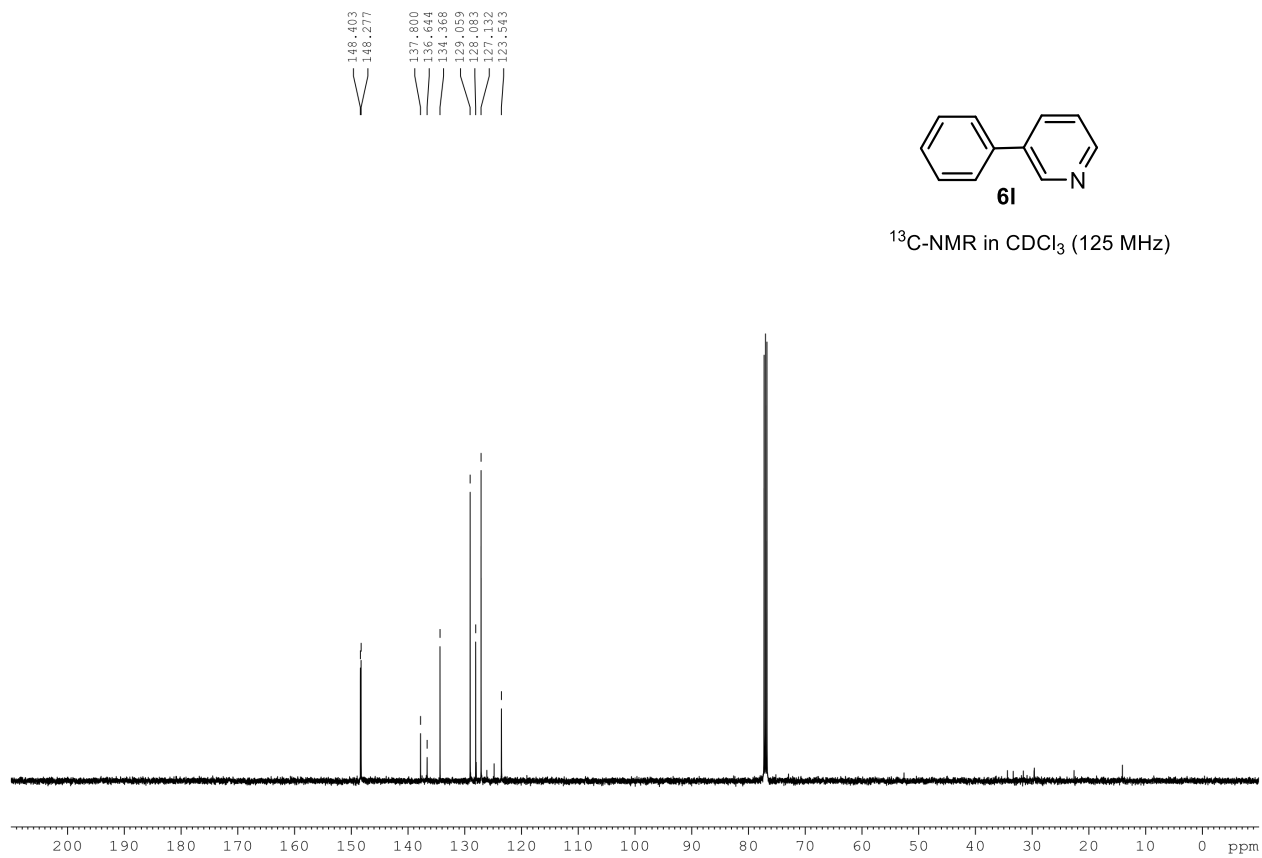

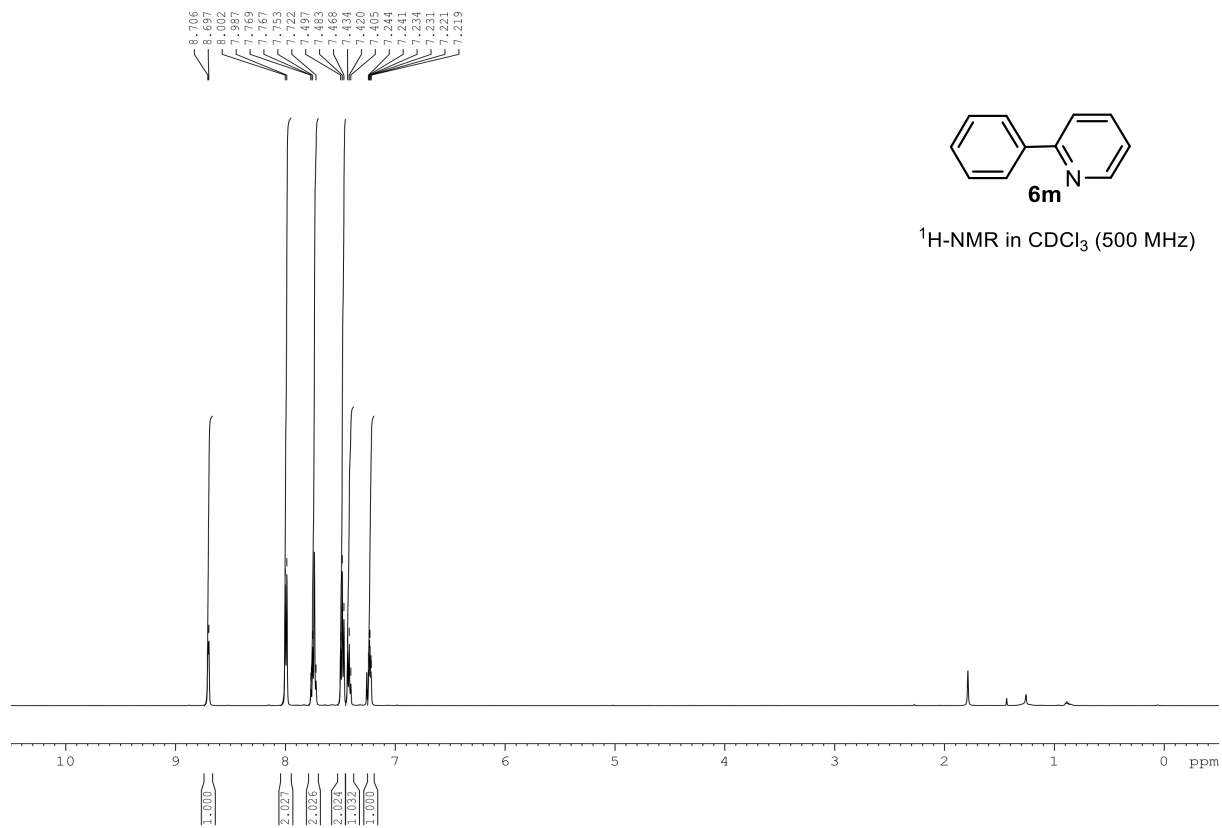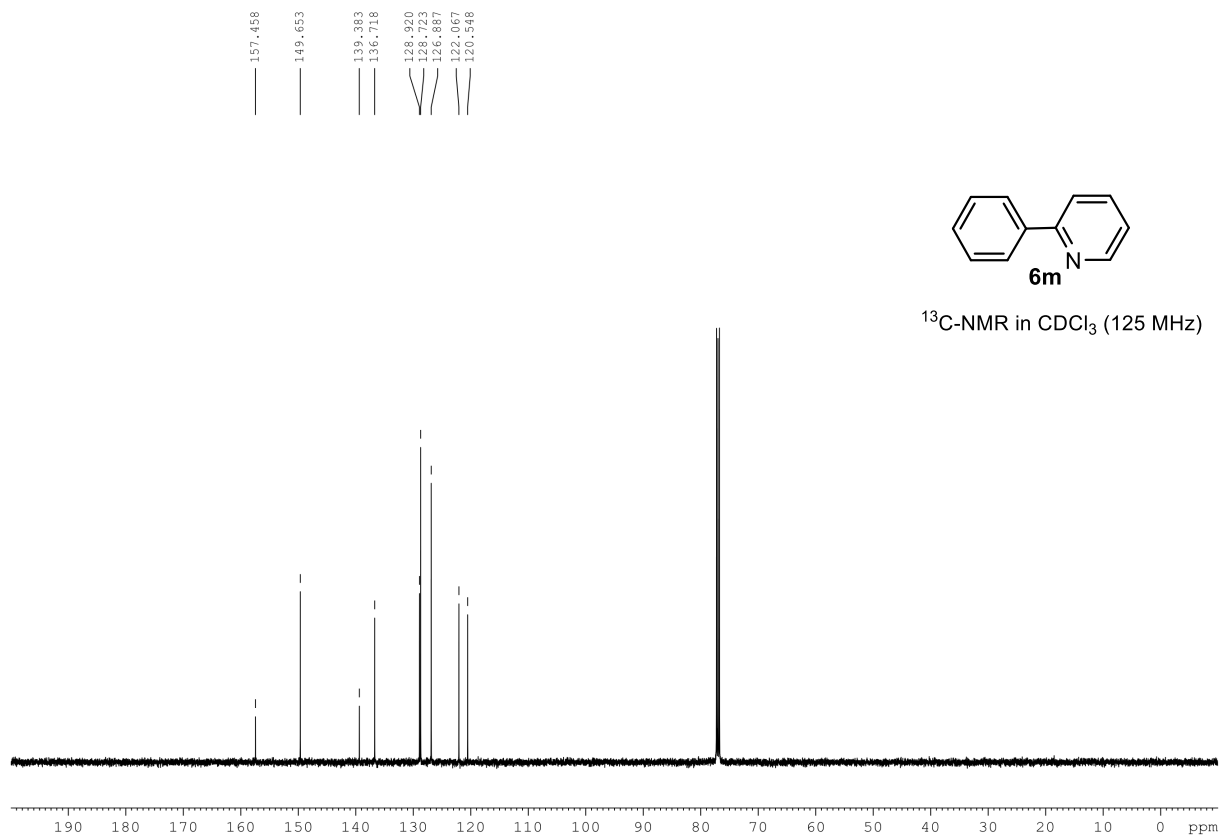



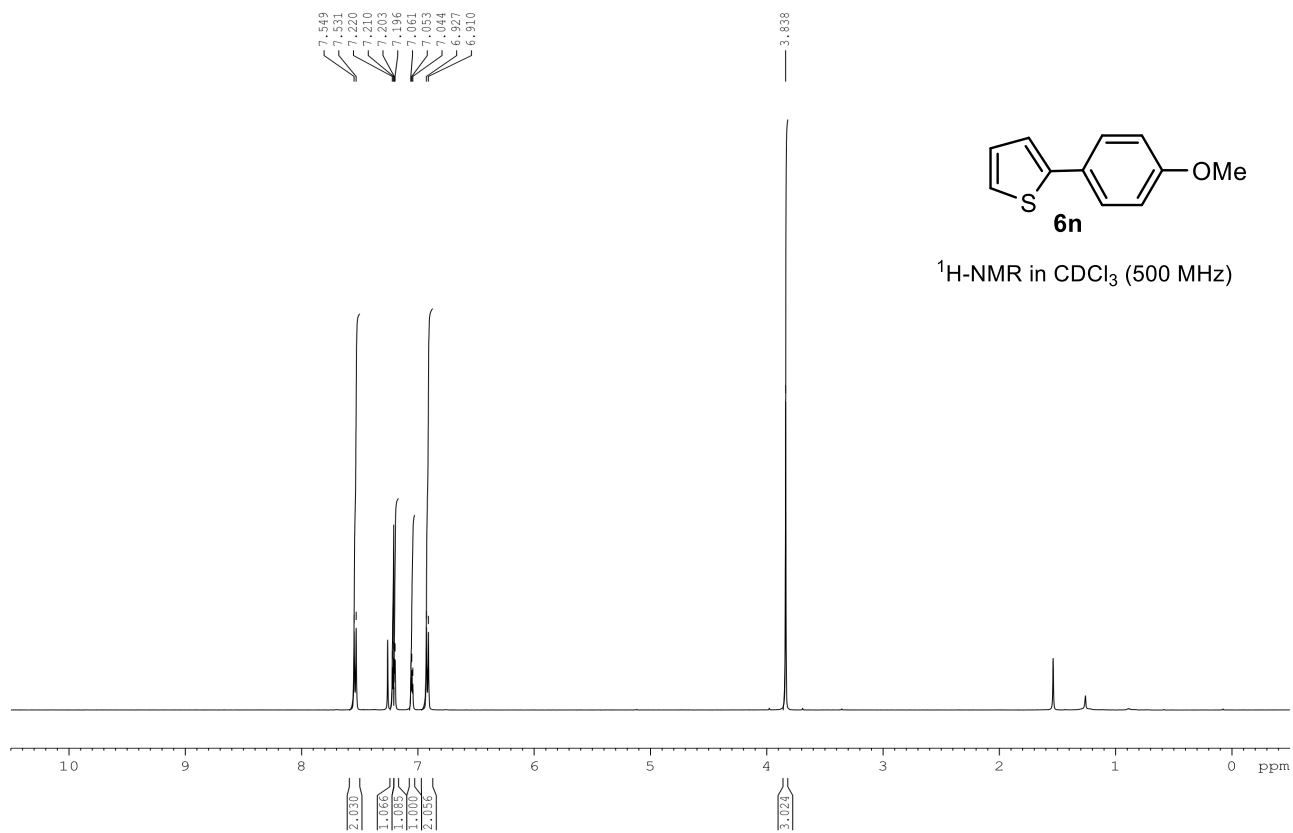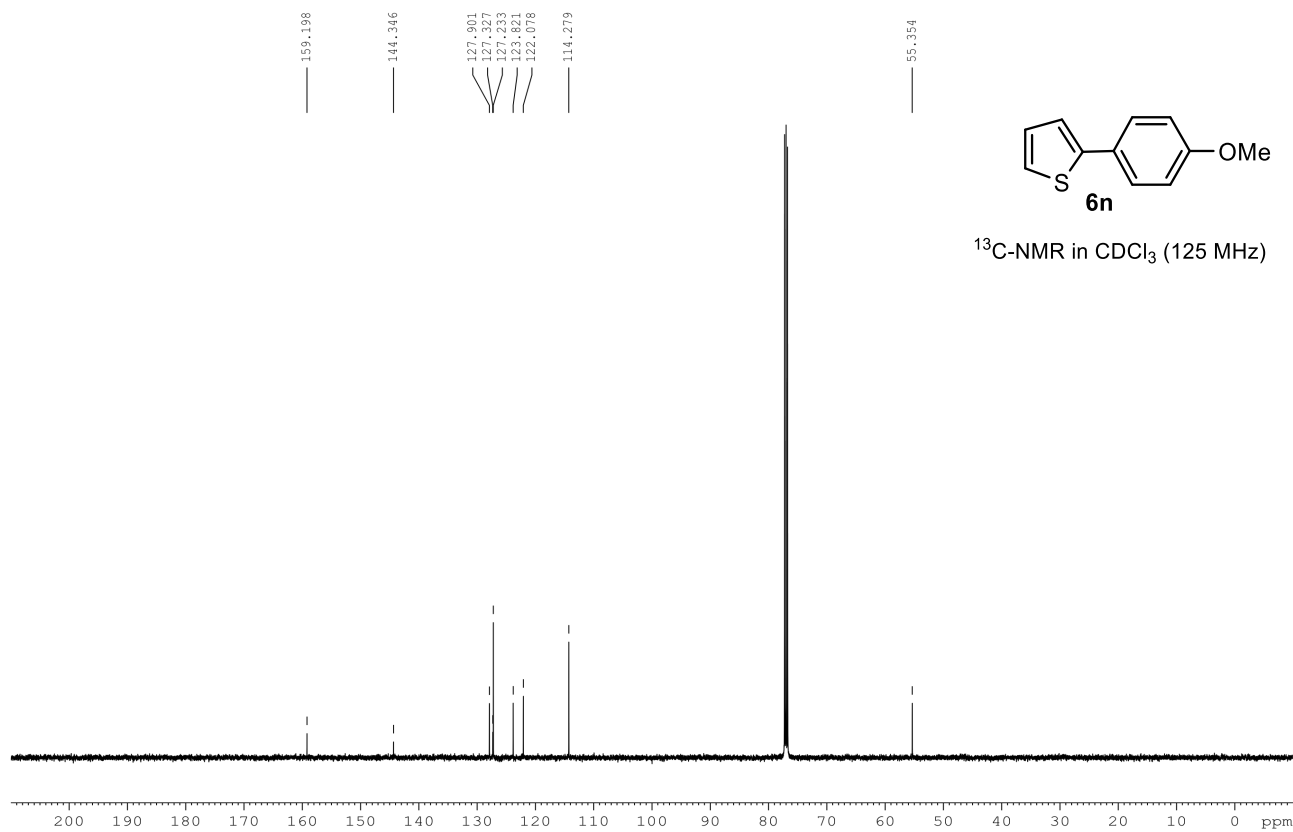

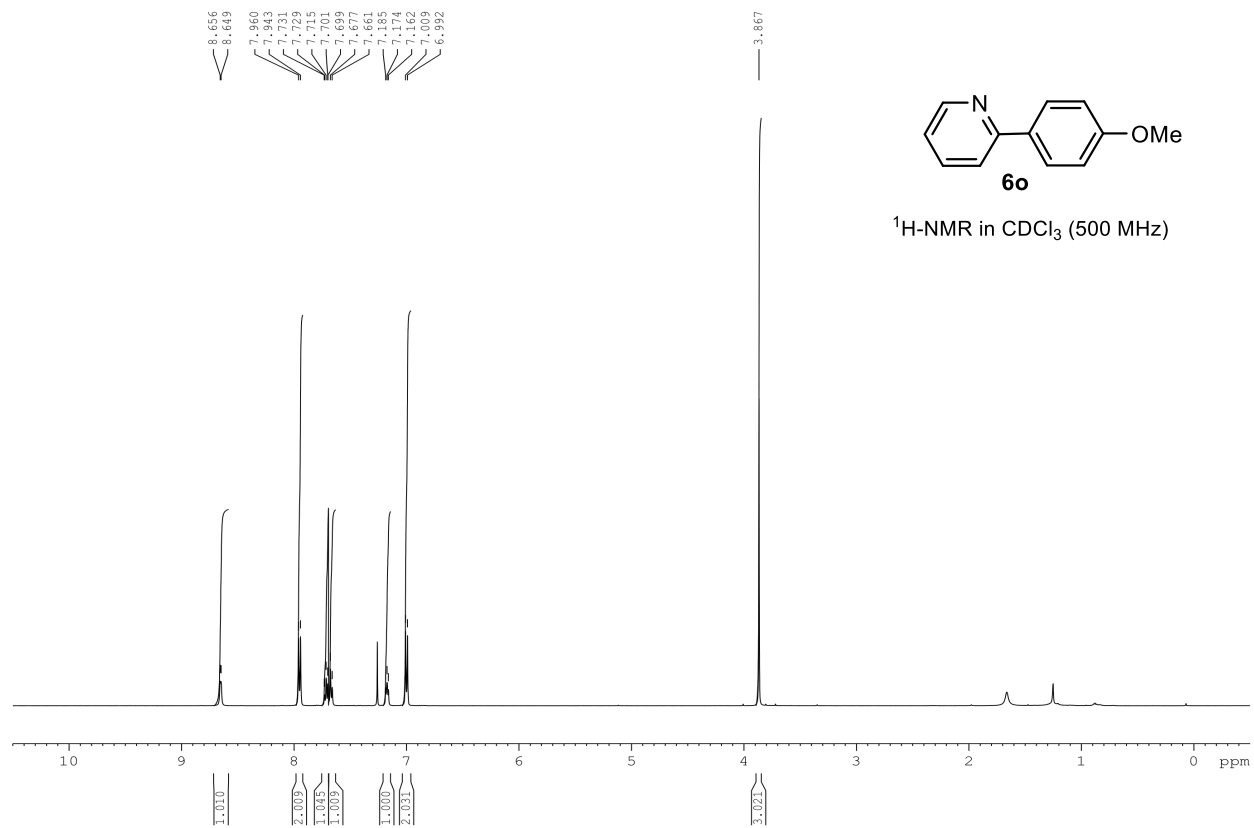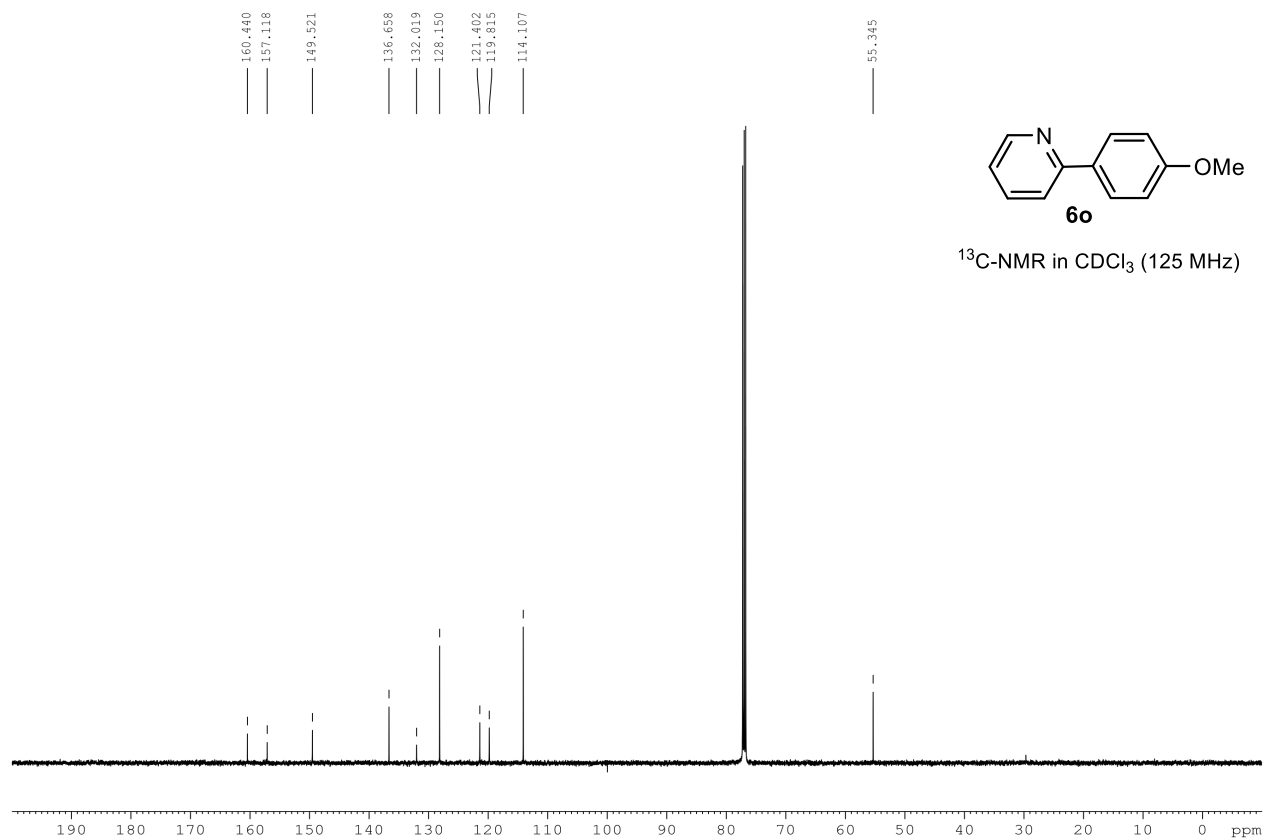



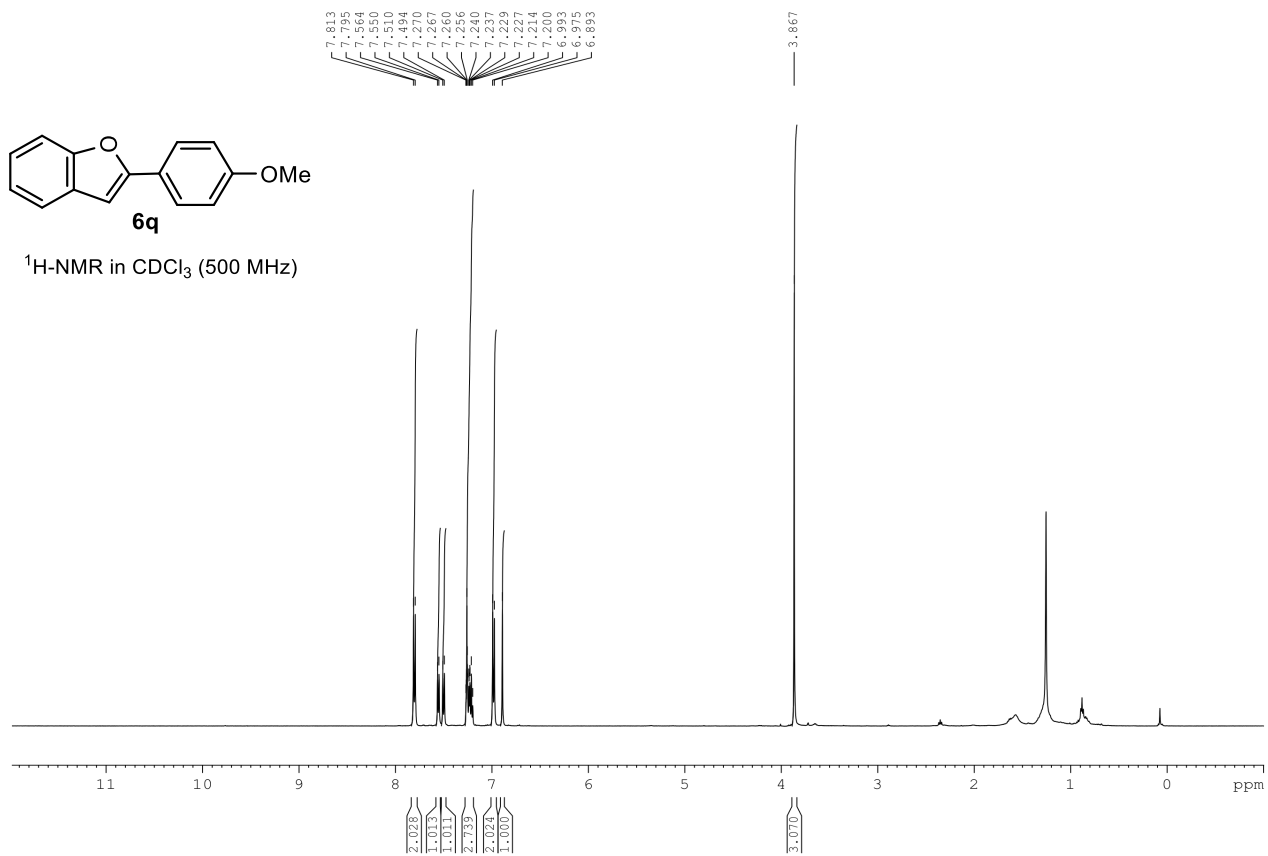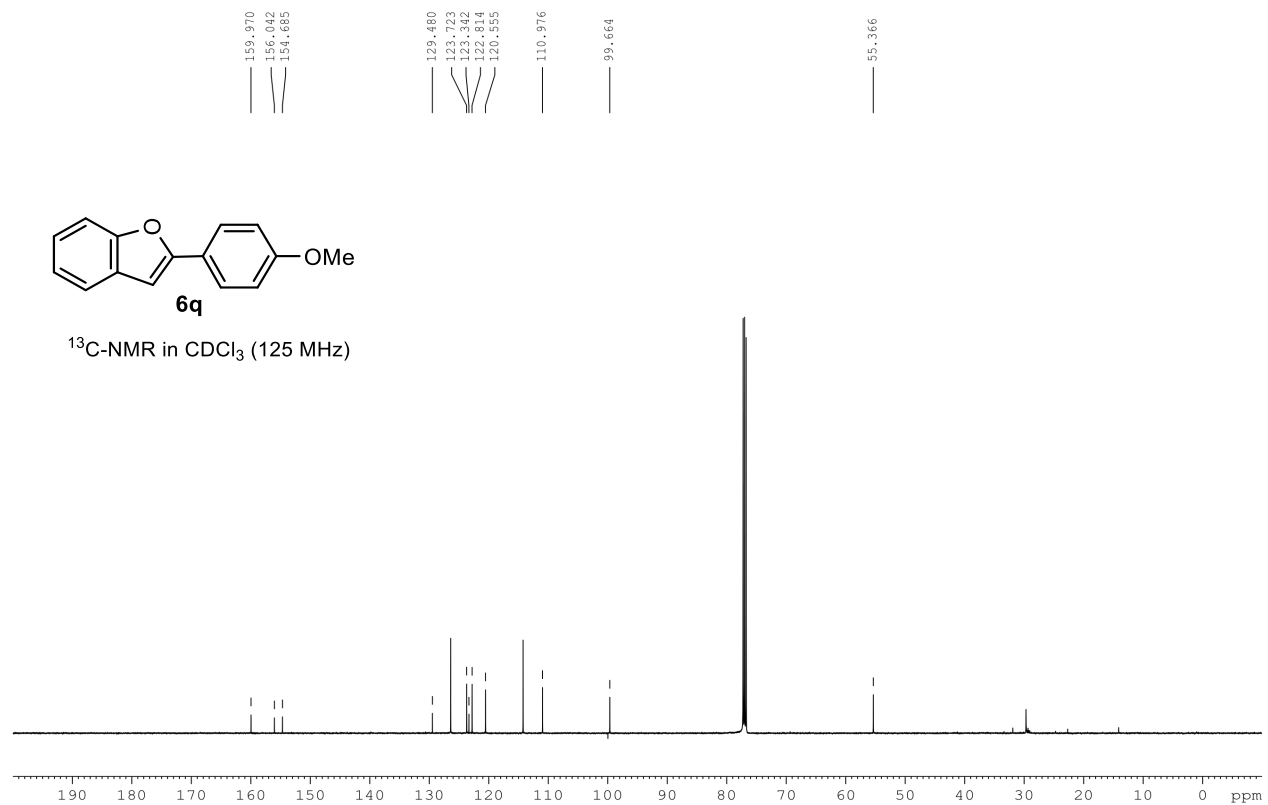

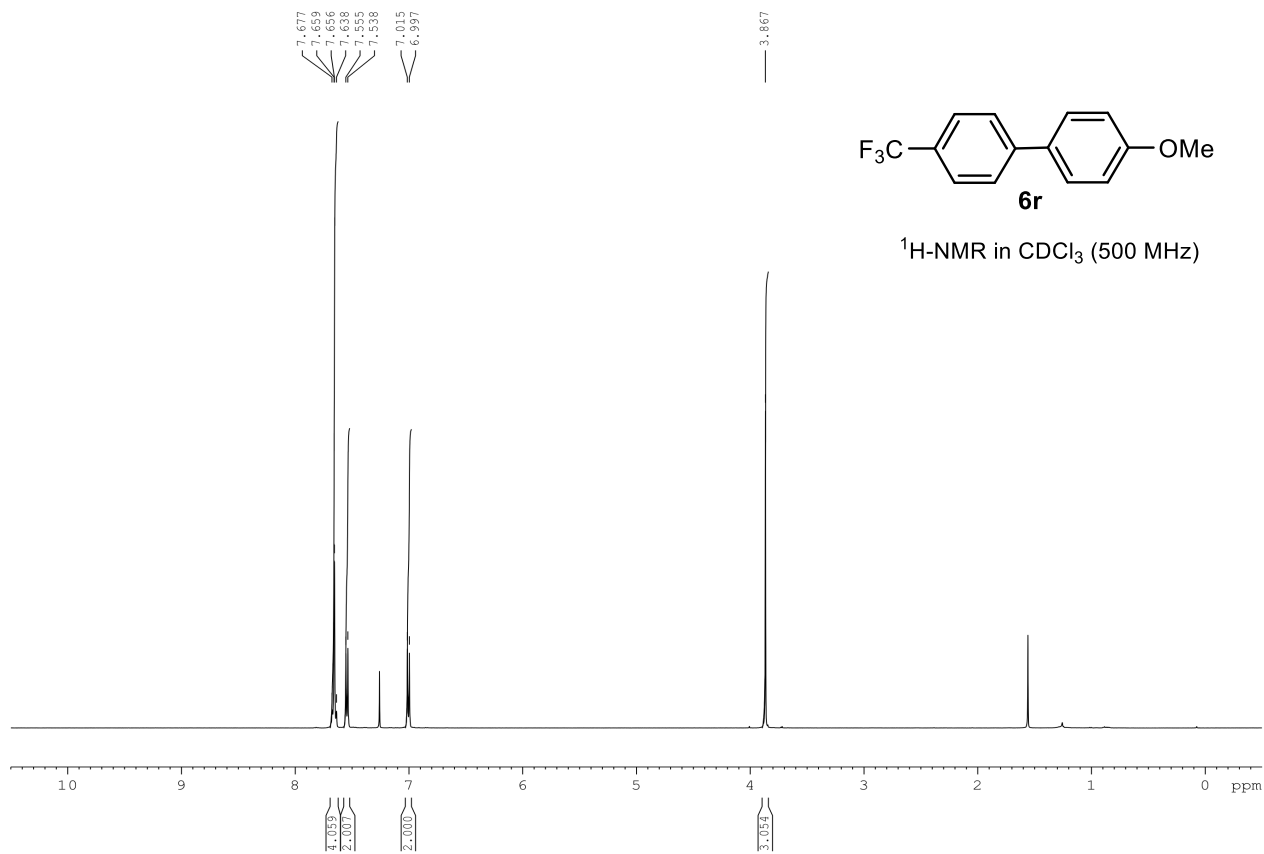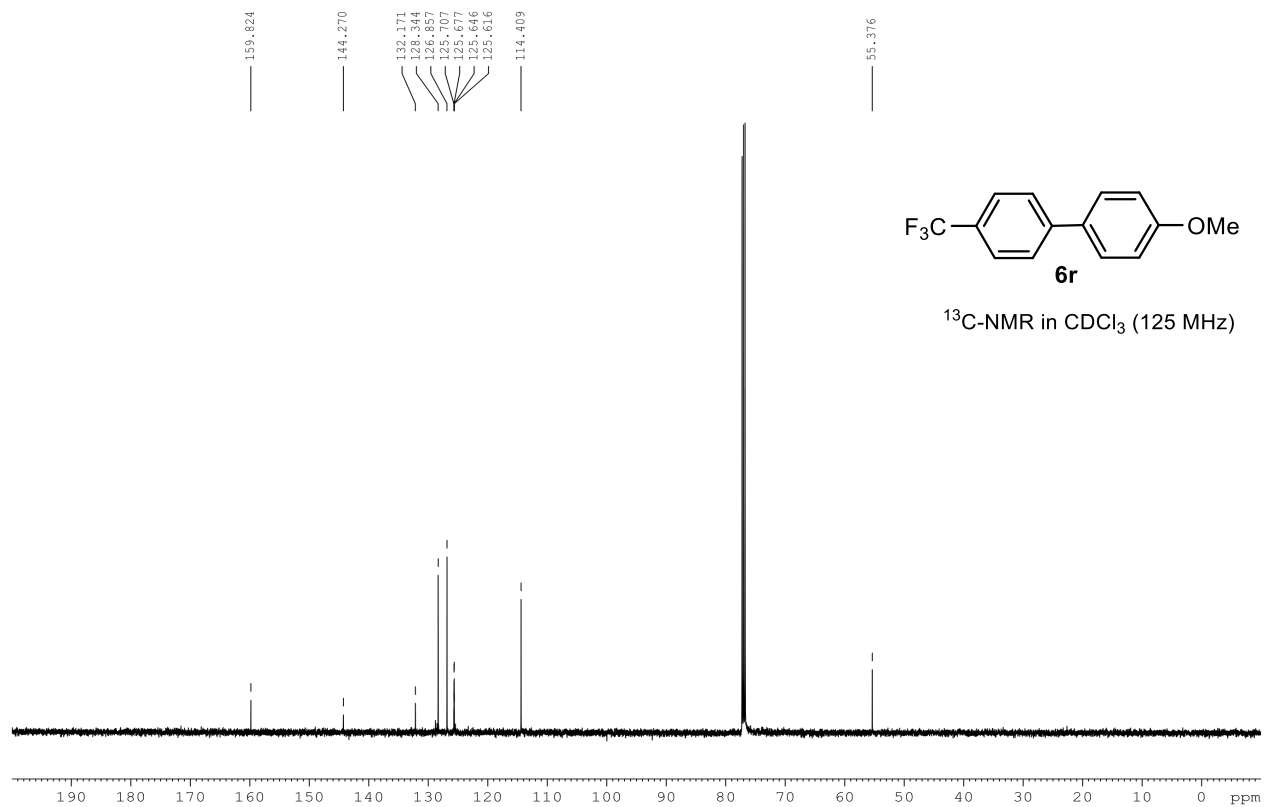

Supplement: NIHMS913477-supplement-Supplemental_Information.pdf [file NIHMS913477-supplement-Supplemental_Information.pdf]
